# 1 **Functional divergence of Plexin B structural motifs in distinct steps of *Drosophila* olfactory** 2 **circuit assembly**

3

4 Ricardo Guajardo<sup>1</sup>, David J Luginbuhl<sup>1</sup>, Shuo Han<sup>2</sup>, Liquan Luo<sup>1,\*</sup>, and Jiefu Li<sup>1</sup>

5

6 <sup>1</sup>Department of Biology, Howard Hughes Medical Institute, Stanford University, Stanford, USA

7 <sup>2</sup>Department of Chemistry, Stanford University, Stanford, USA

8 \*For correspondence: lluo@stanford.edu

9

## 10 **Abstract**

11 Plexins exhibit multitudinous, evolutionarily conserved functions in the development of nervous  
12 systems. However, how Plexins employ their diverse structural motifs *in vivo* to perform distinct  
13 roles in the stepwise assembly of neural circuits is unclear. Here, we systematically mutagenized  
14 structural motifs of *Drosophila* Plexin B (PlexB) and examined the function of these variants at  
15 multiple PlexB-mediated neurodevelopmental processes in olfactory receptor neurons: axon  
16 fasciculation, trajectory choice, and synaptic partner selection. We found that the extracellular  
17 Sema domain is essential for all three processes, the catalytic site of the intracellular RapGAP is  
18 engaged in none, and the intracellular GTPase-binding motifs are essential for trajectory choice  
19 and synaptic partner selection, but are dispensable for fasciculation. Moreover, extracellular  
20 PlexB cleavage serves as a regulatory mechanism of PlexB signaling. Thus, PlexB structural  
21 motifs have divergent roles in distinct steps of neural development, altogether contributing to the  
22 functional versatility of PlexB in neural circuit assembly.

23

## 24 **Introduction**

25 Nervous systems are composed of intricately structured assemblies of neurons. Indeed, their  
26 proper function requires highly specified circuit organization, wherein neurons make precise  
27 connections with their synaptic partners. The study of neural circuit assembly has generated an  
28 ever-expanding catalog of wiring molecules, whose biological roles ensure the fidelity of neuronal  
29 connections and thus of information transmission (Hong and Luo, 2014; Jan and Jan, 2010;  
30 Kolodkin and Tessier-Lavigne, 2011; Li et al., 2018a; Sanes and Yamagata, 2009; Zipursky and  
31 Sanes, 2010). While structural and biophysical studies have advanced our understanding of the  
32 atomic architectures of these wiring molecules, for most of them it remains largely unknown how  
33 their structural motifs behave in specific neurodevelopmental processes *in vivo*.

34 Plexins, a conserved family of single-pass transmembrane receptors, play varied roles in  
35 the development and homeostasis of diverse tissues in both vertebrates and invertebrates.  
36 Through the effort of many laboratories in the past two decades (Alto and Terman, 2017;  
37 Koropouli and Kolodkin, 2014; Kruger et al., 2005; Pascoe et al., 2015; Pasterkamp, 2012;  
38 Siebold and Jones, 2013; Worzfeld and Offermanns, 2014), genetic functions and biochemical  
39 properties of Plexins have been substantially characterized. However, even for Plexins, we have

40 sparse knowledge on the connection between their structural motifs and their *in vivo* cellular  
41 functions, especially in the context of multi-step neural circuit assembly.

42 Over 600 million years old, Plexin-family receptors display high degrees of conservation  
43 across evolutionarily distant species for both extracellular and cytoplasmic domains (Junqueira  
44 Alves et al., 2019). Structural and biochemical investigations have identified several core domains  
45 required for Plexin signaling (Bell et al., 2011; He et al., 2009; Janssen et al., 2010, 2012; Kong  
46 et al., 2016; Liu et al., 2010; Nogi et al., 2010; Shang et al., 2017; Tong et al., 2009, 2007, 2008;  
47 Wang et al., 2012, 2013): the extracellular Sema domain, the intracellular Rac and Rho GTPase-  
48 binding sites, and the intracellular catalytic RapGAP domain (Figure 1A). Besides the Mical and  
49 CRMP (collapsin response mediator protein) pathways for certain Plexins (Alto and Terman,  
50 2017), the current working model of Plexin signal transduction suggests that concomitant  
51 Semaphorin extracellular binding and Rac intracellular binding lead to Plexin dimerization, which  
52 subsequently activates the catalytic GAP domain to hydrolyze Rap-GTP for downstream signaling  
53 (Pascoe et al., 2015). However, the *in vivo* functional relevance of this model has yet to be  
54 determined. Notably, the catalytic GAP domain has been shown to be essential in neural tube  
55 closure (Worzfeld et al., 2014) but not in motor axon guidance (Yang et al., 2016), suggesting that  
56 Plexins may use structural motifs differentially in distinct developmental contexts. Moreover,  
57 certain Plexin motifs have yet to be functionally characterized. We particularly note the convertase  
58 cleavage site – a conserved signature of all class B Plexins (Artigiani et al., 2003). Despite its  
59 conservation across hundreds of millions of years, to our knowledge no biological function has  
60 ever been reported since its discovery over a decade ago. Considering that the cleavage event  
61 breaks the Plexin protein and thus physically separates the extracellular and transmembrane-  
62 cytoplasmic parts, it can activate, inactivate, or serve a more complex regulator role in Plexin B  
63 signaling.

64 We recently reported that PlexB plays indispensable roles in multiple steps during the  
65 assembly of the *Drosophila* olfactory map, with level-independent functions in the axon  
66 fasciculation of olfactory receptor neurons (ORNs) and level-dependent tasks in ORN axon  
67 trajectory choice and subsequent glomerular targeting (Li et al., 2018b). These findings reveal  
68 that, within one system, PlexB regulates several fundamental cellular processes of neural wiring,  
69 namely axon-axon interaction (fasciculation), axon guidance (trajectory choice), and synaptic  
70 partner selection (glomerular targeting) (Figure 1C). Given that this level dependence is only  
71 observed in trajectory choice and glomerular targeting but not in fasciculation, it is likely that PlexB  
72 signals in different ways when executing these distinct tasks. The multi-step development of the  
73 fly olfactory map thus provides an excellent system for characterizing the structure-to-function  
74 relationship of Plexin *in vivo*.

75 Through systematic mutagenesis of PlexB structural motifs (Figure 1A, B) and functional  
76 interrogation in the context of fly olfactory circuit assembly (Figure 1C), we report here the  
77 differential engagement of PlexB structural motifs in distinct neurodevelopmental processes.  
78 From the global necessity of Sema domain to the overall expendability of GAP catalytic integrity,

79 as well as the involvement of GTPase-binding motifs in trajectory choice and glomerular targeting  
80 but not in fasciculation, our findings link the categorical diversity of PlexB-dependent wiring  
81 processes to its varied utilization of distinct signaling modules. Moreover, we identified a  
82 regulatory role of PlexB cleavage *in vivo* and surprisingly found that the cleaved fragments can  
83 functionally reconstitute for signaling. Collectively, our analysis reveals how a single molecule,  
84 PlexB, plays multitudinous roles in instructing cellular behaviors through the varied use of its  
85 distinct structural motifs.

86

## 87 **Results**

### 88 **Systematic mutagenesis of PlexB structural motifs and *in vivo* functional assays**

89 To dissect the structure-to-function relationship of PlexB in the assembly of the fly olfactory map,  
90 we generated nine UAS transgenic lines carrying PlexB variants (described below; Figure 1B)  
91 produced by site-directed mutagenesis. A V5 tag was added to the C-terminus of each variant.  
92 To obtain comparable expression levels, all transgenes were mutagenized from a single wild-type  
93 *UAS-PlexB* construct (Joo et al., 2013) and integrated into the same genomic locus, *ZH-attP-*  
94 *86Fb* (Bischof et al., 2007). Their expression in *Drosophila* neurons *in vivo* was verified by  
95 Western blotting with an anti-V5 antibody (Figure 1-figure supplement 1).

96 **Sema Domain** The extracellular Sema domain is a molecular signature of Plexins and  
97 Semaphorins – the canonical Plexin ligands. It mediates binding between Plexins and  
98 Semaphorins and triggers Plexin signal transduction (Janssen et al., 2010; Nogi et al., 2010).  
99 PlexB with its entire Sema domain deleted ( $\Delta$ Sema) was expressed and cleaved normally *in vivo*  
100 (Figure 1-figure supplement 1).

101 **Catalytic RapGAP Domain** A bipartite GTPase-activating protein (GAP) domain resides  
102 in the cytoplasmic part of Plexins. Recent studies identified the Ras homolog Rap as its substrate  
103 for signal transduction (Wang et al., 2012, 2013). With homology alignment, we identified the  
104 three arginine residues that are essential for the GAP catalytic activity (Wang et al., 2012;  
105 Worzfeld et al., 2014) in fly PlexB and generated a variant with all three arginine sites mutated  
106 (R1570A, R1571G, R1899A; noted as GAP<sup>mut</sup>). These point mutations did not affect PlexB's  
107 expression and cleavage *in vivo* (Figure 1-figure supplement 1).

108 **GTPase-binding Sites** Sitting between the two arms of the RapGAP domain, the  
109 GTPase-binding region of fly PlexB has been shown to interact with small GTPases Rac1 and  
110 Rho1 (Hu et al., 2001). Within this region, two phylogenetically conserved sites mediate the  
111 PlexB-Rac1 interaction. Structural analysis found that class B Plexins can interact simultaneously  
112 with two Rac1 molecules, with one bound at each site (Bell et al., 2011). Thus, we built two PlexB  
113 variants that independently disrupt the Rac1-binding sites:  $\Delta$ Rac1, which contains a small deletion  
114 in the first Rac1-binding site (Hu et al., 2001), and Rac1<sup>mut</sup>, which has two amino acid substitutions  
115 (T1835E, R1836A) in the second site (Bell et al., 2011). We also generated a small deletion  
116 ( $\Delta$ Rho1) that abolishes the PlexB-Rho1 interaction (Hu et al., 2001).

117 Intriguingly, while full-length PlexB proteins were present normally, the cleaved C-terminal  
118 fragment was markedly reduced in  $\Delta$ Rac1 or  $\Delta$ Rho1 variants (Figure 1-figure supplement 1), as  
119 previously observed in cell culture (Artigiani et al., 2003). We will elaborate on this observation in  
120 the context of developmental function in the Discussion section.

121 **Cleavage Site** The functionally uncharacterized cleavage is a conserved signature of all  
122 class B Plexins from flies to mammals. In developing fly brains, only a small fraction of  
123 endogenous PlexB proteins are present in the full-length form (Li et al., 2018b). Notably, the  
124 cleaved C-terminal fragment is not degraded *in vivo*. This is consistent with a previous observation  
125 that cleaved PlexB subunits stably associate in a complex in cell culture (Artigiani et al., 2003),  
126 suggesting that cleaved PlexB may be functional in signaling. To investigate the function of PlexB  
127 cleavage *in vivo*, we generated a PlexB variant with its cleavage sites mutated (R1196A, R1199A;  
128 noted as Uncleav), as well as constructs expressing cleaved N-terminal and C-terminal products  
129 (Cleav<sup>Sec</sup> and Cleav<sup>TM<sub>Cyto</sub></sup>, respectively). Indeed, the two arginine mutations abolished PlexB  
130 cleavage and increased the presence of full-length PlexB (Figure 1-figure supplement 1). We also  
131 observed two faint bands around 100kDa, the pattern of which was distinct from the original  
132 cleavage (Figure 1-figure supplement 1). PlexB possibly undergoes atypical processing when the  
133 convertase site is mutated. The cleaved fragments, when individually expressed, were also stable  
134 *in vivo* (Figure 1-figure supplement 1).

135 To determine the developmental function of these PlexB structural motifs, we tested the  
136 efficacy of these variants at recapitulating the activity of wild-type PlexB in multiple wiring tasks in  
137 developing fly olfactory receptor neurons: axon fasciculation, axon trajectory choice, and synaptic  
138 partner selection (Figure 1C). While all of them are PlexB-dependent, these wiring processes  
139 occur sequentially and can be assayed independently (Li et al., 2018b), thus providing a platform  
140 for examining the functional engagement of individual motifs in distinct developmental tasks.

141

#### 142 **Axon fasciculation**

143 At about 18 hours after puparium formation (hAPF), ORN axons arrive at the antennal lobe and  
144 fasciculate with neighboring axons, forming two discrete bundles. Over the next 6 hours, these  
145 two axon bundles circumnavigate the antennal lobe (Figure 2A, left panel). Previously, we found  
146 that ORN axon fasciculation is mediated by PlexB-dependent axon-axon interactions (Joo et al.,  
147 2013; Li et al., 2018b). In PlexB loss-of-function mutants (*plexB*<sup>-/-</sup>), ORN axon defasciculation  
148 was observed in almost every antennal lobe with differing severity (Figure 2A, middle and right  
149 panels; Figure 2B). To quantify the fasciculation defects, we blindly binned 24hAPF antennal  
150 lobes into one of the three following categories: 1) no defasciculation (Figure 2A, left panel); 2)  
151 mild defasciculation, in which fasciculation defects were present but axon bundles that normally  
152 circumnavigate the antennal lobe were clearly preserved (Figure 2A, middle panel); and 3) severe  
153 defasciculation, where pronounced invasion of the central antennal lobe by ORN axons was  
154 observed, along with the loss of axon bundles (Figure 2A, right panel). In *plexB*<sup>-/-</sup> flies, expression  
155 of a wild-type *PlexB* transgene in ORNs significantly restored axon fasciculation (Figure 2B).

156 However, ORN-specific rescue was not complete (Figure 2B), suggesting that PlexB supplied by  
157 other cellular sources may also contribute to ORN axon fasciculation. Nonetheless, the rescue  
158 assay provides a quantifiable readout with a large dynamic range to examine if each PlexB  
159 structural motif participates in axon fasciculation.

160 As shown in Figure 2C, the rescue by Sema domain-deleted PlexB completely failed,  
161 indicating the necessity of the Sema domain in PlexB-mediated fasciculation. On the other hand,  
162 none of the intracellular motifs we assayed were required, as none of the mutants displayed a  
163 compromised ability to rescue fasciculation defects (Figure 2D-G). These data suggest that either  
164 the cytoplasmic signaling is not required for fasciculation, or that different motifs play redundant  
165 roles in mediating fasciculation.

166 Notably, uncleavable PlexB appeared to exhibit better rescue than wild-type PlexB, with  
167 only one severe defasciculation case out of 47 examined (Figure 2H). Considering that  
168 uncleavable PlexB only supplies full-length PlexB proteins, this finding suggests that the full-  
169 length PlexB proteins play a predominant role in mediating axon fasciculation. Consistently,  
170 neither the N- nor C- terminal cleaved products, when expressed separately (Figure 2I,J) or  
171 together (Figure 2K), exhibited any rescue effects.

172 Taken together, our data suggest that PlexB-dependent axon fasciculation is mediated by  
173 full-length PlexB but not the cleaved fragments. Moreover, fasciculation appears to not require  
174 any individual cytoplasmic signaling motif but relies on the extracellular Sema domain. Thus,  
175 PlexB-dependent axon fasciculation is likely an intercellular adhesion process, in which full-length  
176 PlexB proteins bundle axons together through Sema domain-mediated molecular adhesion.

177

### 178 **Axon trajectory choice**

179 After their arrival at the ventrolateral corner of the antennal lobe at around 18hAPF, individual  
180 ORN axons choose one of the two trajectories – dorsolateral (DL) or ventromedial (VM) – and  
181 then circumnavigate the antennal lobe in the next 6 hours (Figure 3A; left panels) (Jefferis et al.,  
182 2004). Importantly, axons of each ORN class stereotypically choose one defined trajectory. We  
183 previously found that trajectory choice is regulated by the axonal PlexB level: a high PlexB level  
184 drives axons to the DL trajectory while a low PlexB level confers a VM choice (Li et al., 2018b).  
185 Consequently, PlexB overexpression in ORNs shifts axons to the DL trajectory (Figure 3A; right  
186 panels) (Li et al., 2018b). This PlexB level-dependent trajectory choice thus provides an  
187 opportunity to examine the involvement of individual structural motifs in an axon guidance task.  
188 Theoretically, this could also be examined in a rescue context, in which the functionality of PlexB  
189 variants is tested in a *plexB* null background. However, *plexB* null mutants exhibit axon  
190 fasciculation defects that cannot be completely rescued even by wild-type PlexB, as described  
191 above (Figure 2B). The abundance of defasciculated axons precludes proper quantification of  
192 trajectory choice, making it impracticable to test the structural motifs in a rescue assay. Thus, we  
193 assessed the functional engagement of PlexB structural motifs in trajectory choice by examining  
194 overexpression-induced DL shifting of ORN axons.

195 As described previously (Li et al., 2018b), we quantified the trajectory choice by a ratio of  
196 the fluorescence intensity of DL and VM axons (DL/VM; Figure 3B). Recapitulating our previous  
197 observations, overexpression of wild-type PlexB in ORNs drove axons to the DL bundle, raising  
198 the mean DL/VM ratio to 0.94 from 0.67 of controls (Figure 3A,B). We note that the DL shifting  
199 observed here was not as severe as we previously reported (Li et al., 2018b), probably due to  
200 lower expression of the newly generated transgene, which was inserted at a genomic locus  
201 different from that of the randomly integrated transgene used previously.

202 Between 18–24hAPF, the canonical ligands of PlexB—Sema2a and Sema2b—establish  
203 a gradient along the VM-to-DL axis to instruct PlexB-expressing ORN axons in trajectory choice  
204 (Joo et al., 2013). In line with this, deletion of the Sema domain that mediates the Plexin-  
205 Semaphorin interaction completely disrupted the ability of PlexB to drive a DL shift (Figure 3C).  
206 Regarding the cytoplasmic motifs, mutating either Rac1- or Rho1- binding sites impaired, at least  
207 partially, the DL shift caused by PlexB overexpression (Figure 3E–G), revealing the functional  
208 necessity of PlexB-GTPase interactions in trajectory choice. Notably, while deleting the first of the  
209 Rac1-binding sites ( $\Delta$ Rac1) entirely abolished the DL shift caused by PlexB overexpression  
210 (Figure 3E), mutating the second Rac1-binding site (Rac1<sup>mut</sup>) only partially weakened the  
211 phenotype (Figure 3F), suggesting the differential importance of these sites in mediating the  
212 PlexB-Rac1 interaction. Interestingly, the catalytic RapGAP domain was not required (Figure 3D),  
213 as in PlexA-dependent motor axon guidance (Yang et al., 2016).

214 We then examined the involvement of PlexB cleavage in trajectory choice and found that  
215 uncleavable PlexB was significantly more potent than wild-type PlexB at driving DL shift (Figure  
216 3H), suggesting that full-length PlexB proteins are more active for this function. Considering that  
217 trajectory choice is a PlexB level-dependent process (Li et al., 2018b), the cleavage of PlexB thus  
218 limits the level of full-length PlexB proteins (Figure 1-figure supplement 1) and can potentially  
219 regulate the fidelity of trajectory choice. Intriguingly, while the cleaved fragments did not show any  
220 function individually (Figure 3I,J), simultaneous expression of both partially but significantly  
221 promoted DL shift of ORN axons (Figure 3K), indicating the functional reconstitution of cleaved  
222 fragments *in vivo* for signaling in trajectory choice. In line with this, a previous study observed that  
223 the cleaved Plexin B subunits are biochemically associated with each other as a complex  
224 (Artigiani et al., 2003).

225 In summary, distinct from its adhesion-like function in axon fasciculation (Figure 2), PlexB  
226 instructs axon trajectory choice by engaging both extracellular and cytoplasmic components,  
227 although the RapGAP catalytic activity appears dispensable. Cleavage of PlexB emerges as a  
228 regulatory mechanism on PlexB level and signaling, as both full-length proteins and reconstituted  
229 fragments exhibited activity in trajectory choice.

230

### 231 **Synaptic partner selection**

232 Between 24–48hAPF, ORN axons innervate the antennal lobe and search for the dendrites of  
233 their synaptic partners—olfactory projection neurons (PNs). By 48hAPF, the antennal lobe has

234 been divided into roughly 50 proto-glomeruli, where the axons and dendrites of matching ORNs  
235 and PNs interact (Jefferis et al., 2004). We previously found that PlexB plays a level-dependent  
236 role in instructing glomerular selection of ORN axons, independently of trajectory choice (Li et al.,  
237 2018b). Specifically, ORN axons targeting to several discrete glomeruli express higher levels of  
238 PlexB than their neighbors. These PlexB-high glomeruli localize mainly in the medial antennal  
239 lobe, such as DM1 and DM5, along with a few scattered glomeruli, like VA4. PlexB overexpression  
240 in ORNs promotes mistargeting of ORN axons to PlexB-high glomeruli, while RNAi-based  
241 knockdown shows the opposite preference (Li et al., 2018b).

242 In line with our previous observations, PlexB overexpression caused mistargeting of VA2  
243 ORN axons stereotypically to the DM5 glomerulus (Figure 4A,B). Like the weakened DL shift in  
244 trajectory choice due to the new UAS transgene (Figure 3B), we also note that the mistargeting  
245 preference changed from VA4 to DM5, whose PlexB level is lower than VA4 (Li et al., 2018b).  
246 Similarly, the phenotypic penetrance of mistargeting dropped to about 30% (Figure 4B) from the  
247 original 70% (Li et al., 2018b). Nonetheless, the glomerular mistargeting caused by PlexB  
248 overexpression provides a clear and quantifiable readout for examining the functional  
249 engagement of PlexB structural motifs in synaptic partner selection.

250 PlexB without its Sema domain failed to induce glomerular mistargeting (Figure 4C),  
251 emphasizing the global necessity of Sema domain in all wiring processes examined. In contrast,  
252 the RapGAP catalytic site was not essential for any tested processes, including synaptic partner  
253 selection (Figure 4D). As in trajectory choice, glomerular targeting required PlexB-GTPase  
254 interactions, as the variants disrupting Rac1- or Rho1- binding sites substantially reduced  
255 glomerular mistargeting events caused by PlexB overexpression (Figure 4E-G). Notably, deletion  
256 of the first Rac1-binding site again resulted in greater functional disruption than substitution at the  
257 second site (Figure 4E,F; as well as Figure 3E,F), further supporting the differential importance  
258 of these two regions in bridging PlexB and Rac1.

259 Overexpression of the cleaved products, either independently or together, was insufficient  
260 to drive mistargeting (Figure 4I-K), suggesting that synaptic partner selection is likely mediated  
261 by the full-length PlexB. However, uncleavable PlexB, which produces more full-length proteins  
262 than wild-type (Figure 1-figure supplement 1), did not increase the phenotypic penetrance (Figure  
263 4H). We note that the quantification of glomerular mistargeting, as a binary binning, is less  
264 sensitive than the fluorescence measurement in quantifying trajectory choice. Thus, the resolution  
265 of this assay may not be sufficient to detect any small effect here.

266 Collectively, PlexB-mediated synaptic partner selection engages both extracellular and  
267 cytoplasmic modules for signaling, resembling trajectory choice but not axon fasciculation.  
268 Moreover, extracellular cleavage of PlexB does not appear to be critical in synaptic partner  
269 selection.

270

## 271 Discussion

272 Our systematic *in vivo* analysis shows the divergent engagement of different PlexB structural  
273 motifs in distinct neurodevelopmental processes (Figure 5), arguing against a singular signaling  
274 mechanism for PlexB. We further identify cleavage as a regulatory mechanism of PlexB signaling  
275 *in vivo*, highlighting the functional significance of the evolutionarily conserved cleavage of class B  
276 Plexins. These experiments reveal how a single molecule, PlexB, achieves functional versatility  
277 in neurodevelopment by diversified and task-specific motif engagement, in conjunction with  
278 temporally-regulated expression and level-dependent signaling as we previously discovered (Li  
279 et al., 2018b).

280

### 281 Differential engagement of structural motifs in distinct developmental tasks

282 The extracellular Sema domain is highly conserved in all Plexins and Semaphorins (Goodman et  
283 al., 1999). Structural and biochemical studies have highlighted its central role in mediating Plexin-  
284 Semaphorin interactions (Janssen et al., 2010; Nogi et al., 2010). Consistently, we found that all  
285 three wiring steps examined here rely on the integrity of the Sema domain, further emphasizing  
286 its functional necessity.

287 On the other hand, the catalytic site of the RapGAP domain appears to be dispensable for  
288 all PlexB-mediated wiring processes examined. Although structural and *in vitro* studies have  
289 pinned down Rap as the substrate for Plexin's GAP domains (Wang et al., 2012, 2013), *in vivo*  
290 studies in different developmental systems have yielded contrasting observations regarding the  
291 functional significance of its catalytic activity (Worzfeld et al., 2014; Yang et al., 2016). Thus,  
292 RapGAP-mediated catalysis provides one, but not the only, signaling output of Plexins, further  
293 supporting the notion that Plexins diversely engage signaling motifs for distinct developmental  
294 tasks.

295 It has been shown that the integrity of GTPase-binding sites is crucial for PlexB-mediated  
296 axon guidance of embryonic motor neurons (Hu et al., 2001). Here, we analyzed the functional  
297 involvement of these motifs in three distinct neurodevelopmental tasks and observed differential  
298 necessity among them. While the GTPase-binding sites are entirely dispensable for bundling  
299 ORN axons, both axon trajectory choice and synaptic partner selection require proper GTPase  
300 binding. Notably, the two distinct Rac1-binding sites are of different importance in mediating the  
301 PlexB-Rac1 interaction.

302 We note that the expression levels of our transgenes, while comparable to each other  
303 (Figure 1-supplement 1), may be different from endogenous PlexB. Thus, a negative observation  
304 (e.g., the expendability of the RapGAP catalytic unit) can possibly be caused by overexpression-  
305 induced compensation of a partial loss-of-function mutant. Editing the endogenous *PlexB* locus  
306 would overcome this caveat, at the expense of losing cell type specificity in genetic manipulation,  
307 which is of more concern for a widely expressed protein like PlexB. Despite the technical  
308 limitations, the comparative analysis here allowed us to functionally characterize PlexB structural  
309 motifs individually *in vivo* and reveals how the task-specific, combinatorial engagement of



310 structural motifs enables a single molecule like PlexB to accomplish multiple distinct  
311 developmental tasks in neural circuit assembly (Figure 5).

312

### 313 **Cleavage of class B Plexins – one protein, two functional forms**

314 Numerous cell-surface proteins, including wiring molecules, are cleaved by extracellular  
315 convertases (Duckert et al., 2004). However, for most of them, it remains unclear how cleavage  
316 affects their signaling and functional output. For instance, all class B Plexins possess an  
317 extracellular convertase site (Artigiani et al., 2003), whose biological function, until now, had  
318 remained unknown. Intriguingly, cleaved PlexB fragments are not degraded but remain  
319 biochemically associated in a complex (Artigiani et al., 2003), suggesting that cleaved fragments  
320 participate in PlexB signaling.

321 We previously found that only a small fraction of endogenous PlexB proteins in brains are  
322 in a full-length form (Li et al., 2018b), suggesting that cleavage may play a role in tuning PlexB  
323 signaling. In the current study, we found that uncleavable PlexB produces more full-length  
324 proteins *in vivo* and possesses higher activity in axon fasciculation and trajectory choice than wild-  
325 type PlexB. On the other hand, the two cleaved fragments when expressed together via separate  
326 transgenes could functionally reconstitute PlexB activity in the trajectory choice assay. Taken  
327 together, our findings support the existence of two functional forms of PlexB proteins: full-length  
328 and reconstituted fragments. Considering their distinct biophysical states, we anticipate that these  
329 two forms have different signaling properties. However, the complex and indirect readouts of *in*  
330 *vivo* developmental consequences make it difficult to quantitatively determine these properties.

331 Consistent with previous observations *in vitro* (Artigiani et al., 2003), we found that  
332 disrupting Rac1 or Rho1 binding reduced the presence of cleaved fragments in brains (Figure 1-  
333 figure supplement 1). As mutations at GTPase-binding sites did not affect the rescue of  
334 fasciculation defects (Figure 2), it is unlikely that these mutations disturb membrane localization,  
335 leading to insufficient cleavage. Rather, it is more likely that losing GTPase binding destabilizes  
336 the C-terminal cleaved fragment, which contains a short, degradation-prone extracellular motif.  
337 Considering that the cleaved fragments are capable of signaling, the interaction between GTPase  
338 binding and cleavage adds another layer of complexity to PlexB signaling. Disrupting GTPase  
339 binding may thus cause secondary defects by reducing cleaved PlexB.

340 Taken together, cleavage brings new properties and regulatory potentials to PlexB. It  
341 demands collective efforts from structural, biochemical, and functional approaches to understand  
342 this conserved feature of class B Plexins, as well as many other cleavable wiring molecules.

343

## 344 **Materials and methods**

### 345 Drosophila stocks and genotypes

346 Flies were raised on standard cornmeal medium with a 12 hr/12 hr light cycle at 25°C (excepting  
347 experiments described in Figure 4, where 29°C was used for enhanced transgenic expression).  
348 The following lines were used: *C155-GAL4* (pan-neuronal) (Lin and Goodman, 1994), *Pebbled-*  
349 *GAL4* (*Peb-GAL4*, pan-ORN) (Sweeney et al., 2007), *Or92a-rCD2* (VA2 ORNs) (Li et al., 2018b),  
350 *UAS-mtdTomato* (Potter et al., 2010), *plexB*<sup>KG00878</sup> (PlexB mutant) (Bellen et al., 2004), as well as  
351 our newly generated UAS transgenes encoding PlexB variants: WT,  $\Delta$ Sema,  $GAP^{mut}$ ,  $\Delta$ Rac1,  
352  $Rac1^{mut}$ ,  $\Delta$ Rho1, Uncleav,  $Cleav^{Sec}$ , and  $Cleav^{TMCyto}$ . Complete genotypes of figure panels are  
353 described in Supplementary File 1.

354

### 355 Generation of UAS transgenes encoding PlexB variants

356 The sequence encoding wild-type PlexB (Joo et al., 2013) was amplified by Q5 hot-start high-  
357 fidelity DNA polymerase (New England Biolabs, Ipswich, MA, USA) and assembled into a *pUAST-*  
358 *attB* vector (Li et al., 2017) by NEBuilder HiFi DNA assembly master mix (New England Biolabs,  
359 Ipswich, MA, USA). A V5 tag was inserted before the stop codon by Q5 site-directed mutagenesis  
360 kit (New England Biolabs, Ipswich, MA, USA). Afterwards, deletions and point mutations were  
361 introduced by Q5 site-directed mutagenesis kit (New England Biolabs, Ipswich, MA, USA). All  
362 constructs were transformed into NEB stable competent *E. coli* (New England Biolabs, Ipswich,  
363 MA, USA), extracted by QIAprep spin miniprep kit (QIAGEN, Hilden, Germany), and verified by  
364 full-length sequencing (Elim Biopharmaceuticals, Hayward, CA, USA). Constructs were then  
365 injected into *vas-int.Dm;;ZH-attP-86Fb* embryos (Bischof et al., 2007). *White+* progenies were  
366 individually balanced by *TM3* or *TM6B*, with the *vas-int.Dm* transgene removed.

367

### 368 Immunocytochemistry

369 Fly brains were dissected and immunostained according to previously described methods (Wu  
370 and Luo, 2006; Wu et al., 2017). Briefly, brains were dissected in phosphate buffered saline (PBS)  
371 (Thermo Fisher, Waltham, MA) and subsequently fixed in 4% paraformaldehyde (Electron  
372 Microscopy Sciences, Hatfield, PA, USA) in PBS with 0.015% Triton X-100 (Sigma-Aldrich, St.  
373 Louis, MO, USA) for 20 minutes on a nutator at room temperature. Once fixed, brains were  
374 washed with PBST (0.3% Triton X-100 in PBS) four times, each time for 20 minutes on a nutator  
375 at room temperature. Brains were then blocked in 5% normal donkey serum (Jackson  
376 ImmunoResearch, West Grove, PA, USA) in PBST overnight at 4°C or for 1 hour at room  
377 temperature on a nutator. Then, brains were incubated in primary antibody diluted in the blocking  
378 solution for 36-48 hours on a 4°C nutator. Brains were then washed 4 times in PBST, each time  
379 nutating for 20 minutes at room temperature. Next, brains were incubated with secondary  
380 antibodies diluted in the blocking solution and nutated in the dark for 36-48 hours at 4°C. Brains  
381 were again washed with PBST four times, each time on a nutator for 20 min at room temperature.

382 Once immunostained, brains were mounted on slides with SlowFade antifade reagent (Thermo  
383 Fisher, Waltham, MA, USA) and stored at 4°C prior to imaging.

384 Primary antibodies used in this study include: rat anti-NCad (1:40; DN-Ex#8,  
385 Developmental Studies Hybridoma Bank, Iowa City, IA, USA), rabbit anti-DsRed (1:200; 632496,  
386 Clontech, Mountain View, CA, USA), mouse anti-rat CD2 (1:200; OX-34, Bio-Rad, Hercules, CA,  
387 USA). Donkey secondary antibodies conjugated to Alexa Fluor 405/568/647 (Jackson  
388 ImmunoResearch, West Grove, PA, USA) were used at 1:250.

389

#### 390 Image acquisition, processing, and quantification

391 Images were acquired by a Zeiss LSM 780 laser-scanning confocal microscope (Carl Zeiss,  
392 Oberkochen, Germany), with a 40x/1.4 Plan-Apochromat oil objective (Carl Zeiss, Oberkochen,  
393 Germany). Confocal z-stacks were obtained by 1 µm intervals at the resolution of 512 × 512.

394 For quantification of fasciculation defects, a single scorer binned antennal lobes into three  
395 categories – “no defasciculation”, “mild defasciculation”, and “severe defasciculation” – while  
396 blinded to the genotypes. Antennal lobes with clear trajectories and lacking axon invasion into the  
397 lobe were binned as “no defasciculation”. Both “mild defasciculation” and “severe defasciculation”  
398 indicate axon invasion into the antennal lobe, while the “severe” cases also showed the loss of  
399 trajectories.

400 We quantified ORN axon trajectories at 24hAPF as previously described (Li et al., 2018b).  
401 Briefly, the z-stack of an antennal lobe was collapsed to one image by maximum intensity  
402 projection (ZEN software, Carl Zeiss, Oberkochen, Germany). Each antennal lobe was divided  
403 into two halves (DL and VM) by the line from the ORN axon entry point to the commissure merging  
404 point. The fluorescence intensities of the DL and VM halves and an area outside of the antennal  
405 lobe (background) were measured by ImageJ (NIH, Bethesda, MD, USA). Background  
406 fluorescence intensity was deducted to obtain the corrected intensities of the DL and VM axon  
407 trajectories. The DL/VM ratio was calculated by Excel (Microsoft, Redmond, WA, USA).

408 Images were exported as maximum projections by ZEN (Carl Zeiss, Oberkochen,  
409 Germany) in the format of TIFF. Preview (Apple, Cupertino, CA, USA) was used for image rotation  
410 and cropping. Illustrator (Adobe, San Jose, CA) was used to make diagrams and assemble  
411 figures.

412

#### 413 Western blot

414 Brains and ventral nerve cords of third-instar larvae were dissected in the Schneider’s *Drosophila*  
415 medium (Thermo Fisher, Waltham, MA, USA) and snap frozen in liquid nitrogen before stored at  
416 –80°C. Samples were lysed on ice in pre-cooled RIPA buffer (Thermo Fisher, Waltham, MA, USA)  
417 with protease inhibitors (100X Halt cocktail; Thermo Fisher, Waltham, MA, USA) and then rotated  
418 for 2 hours at 4°C. After centrifugation for 30 min at 16000 RCF (relative centrifugal force) at 4°C,  
419 the supernatant was collected and kept on ice. Laemmli sample buffer (Bio-Rad, Hercules, CA,  
420 USA) and 20mM dithiothreitol (Sigma-Aldrich, St. Louis, MO, USA) were added to the sample,

421 followed by heating at 95°C for 10 min. Precision Plus Protein Kaleidoscope prestained protein  
422 standard (Bio-Rad, Hercules, CA, USA) was used as the molecular weight marker.  
423 Electrophoresis with the NuPAGE Tris-acetate gel and PVDF membrane transfer (Thermo Fisher,  
424 Waltham, MA, USA) were performed according to the manufacturer's protocols. We note that the  
425 PlexB protein level is extremely low *in vivo*, even in the context of overexpression (Li et al., 2018b).  
426 Accordingly, routine blocking reagents, such as nonfat dry milk or bovine serum albumin, and  
427 conventional substrates for HRP were not able to yield clear blotting results. The membrane was  
428 blocked by TBS-buffered SuperBlock solution (Thermo Fisher, Waltham, MA, USA) and incubated  
429 with the primary antibody (mouse anti-V5, 1:300, R960-25; Thermo Fisher, Waltham, MA, USA)  
430 in SuperBlock for 72 hours on a 4°C orbital shaker. After washing with TBST (25 mM Tris, 0.15M  
431 NaCl, 0.05% Tween-20, pH 7.5; Thermo Fisher, Waltham, MA, USA), the membrane was  
432 incubated with the secondary antibody (goat anti-mouse HRP-conjugated, 1:2500; Thermo  
433 Fisher, Waltham, MA, USA) for 2 hours on an orbital shaker at room temperature. The signal was  
434 developed with Clarity Max Western ECL substrate (Bio-Rad, Hercules, CA, USA) and captured  
435 by the ChemiDoc XRS+ system (Bio-Rad, Hercules, CA, USA). Afterwards, the membrane was  
436 stripped in Restore PLUS Western blot stripping buffer for 15 min at 37°C with occasional shaking,  
437 followed by re-blocking with TBS-buffered SuperBlock. N-cadherin and actin controls were blotted  
438 in a routine Western procedure with the following antibodies: rat anti-NCad (1:300; DN-Ex#8,  
439 Developmental Studies Hybridoma Bank, Iowa City, IA, USA) and mouse anti-actin (1:2000;  
440 ab8224, Abcam, Cambridge, UK).

441

#### 442 Statistical Analysis

443 No statistical methods were used to determine sample sizes, but our sample sizes were similar  
444 to those generally employed in the field. Antennal lobes damaged in dissection were excluded  
445 from analysis; otherwise, all samples were included. Except for scoring the fasciculation defects,  
446 data collection and analysis were not performed blind to the conditions of the experiments.  
447 GraphPad Prism (GraphPad Software, La Jolla, CA, USA) was used for statistical analysis and  
448 plotting. Significance among multiple groups was determined by one-way ANOVA with Tukey's  
449 test for multiple comparisons. Significance of contingency tables was determined by Fisher's  
450 exact test.

451

452

## 453 **Acknowledgements**

454 We thank Alex Kolodkin for the kind gifts of reagents, the Bloomington *Drosophila* Stock Center  
455 and the Vienna *Drosophila* Resource Center for fly lines, and Addgene for plasmids. We  
456 acknowledge Thomas Clandinin, K Christopher Garcia, Yanyang Ge, Justus Kecsichull, Hongjie  
457 Li, Tongchao Li, Colleen McLaughlin, Daniel Pederick, Kang Shen, Andrew Shuster, Michael  
458 Simon, Yukari Takeo, David Wang, Qijing Xie, Chuanyun Xu, and all Luo lab members for  
459 technical support, insightful advice, and/or critical comments on this study. We thank Alice Ting  
460 for her support of Shuo Han. We also acknowledge Mary Molacavage and Stephanie Wheaton  
461 for administrative assistance.

462

## 463 **Additional Information**

### 464 Competing interests

465 The authors declare that no competing interests exist.

466

### 467 Funding

468 Ricardo Guajardo was supported by the Bio-X Undergraduate Summer Research Program and  
469 the Stanford Undergraduate Advising and Research Major Grant. Shuo Han is a Bio-X Bowes  
470 interdisciplinary graduate fellow. Jiefu Li was supported by the Genentech Foundation Predoctoral  
471 Fellowship and the Vanessa Kong-Kerzner Graduate Fellowship. Liqun Luo is an investigator of  
472 the Howard Hughes Medical Institute. This study is supported by a grant from the National  
473 Institutes of Health (R01-DC005982). Jiefu Li and Liqun Luo acknowledge the support from the  
474 Yingwei Cui and Hui Zhao Neuroscience Fund. The funders had no role in study design, data  
475 collection and interpretation, or the decision to submit the work for publication.

476

### 477 Author contributions

478 RG, Methodology, Validation, Formal analysis, Investigation, Resources, Data curation, Writing—  
479 original draft, Writing—review & editing, Visualization; DJL, Investigation, Resources; SH,  
480 Investigation; LL, Conceptualization, Methodology, Resources, Writing—original draft, Writing—  
481 review & editing, Supervision, Project administration, Funding acquisition; JL, Conceptualization,  
482 Methodology, Validation, Formal analysis, Investigation, Resources, Data curation, Writing—  
483 original draft, Writing—review & editing, Visualization, Supervision.

484

## 485 **References**

486 Alto, L.T., and Terman, J.R. (2017). Semaphorins and their Signaling Mechanisms. *Methods*  
487 *Mol. Biol.* 1493, 1–25.  
488 Artigiani, S., Barberis, D., Fazzari, P., Longati, P., Angelini, P., van de Loo, J.-W., Comoglio,  
489 P.M., and Tamagnone, L. (2003). Functional regulation of semaphorin receptors by proprotein  
490 convertases. *J. Biol. Chem.* 278, 10094–10101.  
491 Bell, C.H., Aricescu, A.R., Jones, E.Y., and Siebold, C. (2011). A Dual Binding Mode for  
492 RhoGTPases in Plexin Signalling. *Plos Biol.*

493 Bellen, H.J., Levis, R.W., Liao, G., He, Y., Carlson, J.W., Tsang, G., Evans-Holm, M., Hiesinger,  
494 P.R., Schulze, K.L., Rubin, G.M., et al. (2004). The BDGP gene disruption project: single  
495 transposon insertions associated with 40% of *Drosophila* genes. *Genetics* 167, 761–781.  
496 Bischof, J., Maeda, R.K., Hediger, M., Karch, F., and Basler, K. (2007). An optimized  
497 transgenesis system for *Drosophila* using germ-line-specific phiC31 integrases. *Proc. Natl.*  
498 *Acad. Sci. USA* 104, 3312–3317.  
499 Duckert, P., Brunak, S., and Blom, N. (2004). Prediction of proprotein convertase cleavage  
500 sites. *Protein Eng Des Sel* 17, 107–112.  
501 Goodman, C.S., Kolodkin, A.L., Luo, Y., Püschel, A.W., and Raper, J.A. (1999). Unified  
502 nomenclature for the semaphorins/collapsins. *Cell* 97, 551–552.  
503 He, H., Yang, T., Terman, J.R., and Zhang, X. (2009). Crystal structure of the plexin A3  
504 intracellular region reveals an autoinhibited conformation through active site sequestration.  
505 *Proc.Natl.Acad.Sci.USA*.  
506 Hong, W., and Luo, L. (2014). Genetic control of wiring specificity in the fly olfactory system.  
507 *Genetics* 196, 17–29.  
508 Hu, H., Marton, T.F., and Goodman, C.S. (2001). Plexin B mediates axon guidance in  
509 *Drosophila* by simultaneously inhibiting active Rac and enhancing RhoA signaling. *Neuron* 32,  
510 39–51.  
511 Jan, Y.-N., and Jan, L.Y. (2010). Branching out: mechanisms of dendritic arborization. *Nat. Rev.*  
512 *Neurosci.* 11, 316–328.  
513 Janssen, B.J., Robinson, R.A., Perez-Branguli, F., Bell, C.H., Mitchell, K.J., Siebold, C., and  
514 Jones, E.Y. (2010). Structural basis of semaphorin-plexin signalling. *Nature*.  
515 Janssen, B.J.C., Malinauskas, T., Weir, G.A., Cader, M.Z., Siebold, C., and Jones, E.Y. (2012).  
516 Neuropilins lock secreted semaphorins onto plexins in a ternary signaling complex.  
517 *Nat.Struct.Mol.Biol.*  
518 Jefferis, G.S.X.E., Vyas, R.M., Berdnik, D., Ramaekers, A., Stocker, R.F., Tanaka, N.K., Ito, K.,  
519 and Luo, L. (2004). Developmental origin of wiring specificity in the olfactory system of  
520 *Drosophila*. *Development* 131, 117–130.  
521 Joo, W.J., Sweeney, L.B., Liang, L., and Luo, L. (2013). Linking cell fate, trajectory choice, and  
522 target selection: genetic analysis of Sema-2b in olfactory axon targeting. *Neuron* 78, 673–686.  
523 Junqueira Alves, C., Yotoko, K., Zou, H., and Friedel, R.H. (2019). Origin and evolution of  
524 plexins, semaphorins, and Met receptor tyrosine kinases. *Sci. Rep.* 9, 1970.  
525 Kolodkin, A.L., and Tessier-Lavigne, M. (2011). Mechanisms and molecules of neuronal wiring:  
526 a primer. *Cold Spring Harb. Perspect. Biol.* 3.  
527 Kong, Y., Janssen, B.J., Malinauskas, T., Vangoor, V.R., Coles, C.H., Kaufmann, R., Ni, T.,  
528 Gilbert, R.J., Padilla-Parra, S., Pasterkamp, R.J., et al. (2016). Structural Basis for Plexin  
529 Activation and Regulation. *Neuron*.  
530 Koropouli, E., and Kolodkin, A.L. (2014). Semaphorins and the dynamic regulation of synapse  
531 assembly, refinement, and function. *Curr. Opin. Neurobiol.* 27, 1–7.  
532 Kruger, R.P., Aurandt, J., and Guan, K.-L. (2005). Semaphorins command cells to move. *Nat.*  
533 *Rev. Mol. Cell Biol.* 6, 789–800.  
534 Li, H., Horns, F., Wu, B., Xie, Q., Li, J., Li, T., Luginbuhl, D.J., Quake, S.R., and Luo, L. (2017).  
535 Classifying *Drosophila* Olfactory Projection Neuron Subtypes by Single-Cell RNA Sequencing.  
536 *Cell* 171, 1206–1220.e22.  
537 Li, H., Shuster, S.A., Li, J., and Luo, L. (2018a). Linking neuronal lineage and wiring specificity.  
538 *Neural Dev.* 13, 5.  
539 Li, J., Guajardo, R., Xu, C., Wu, B., Li, H., Li, T., Luginbuhl, D.J., Xie, X., and Luo, L. (2018b).  
540 Stepwise wiring of the *Drosophila* olfactory map requires specific Plexin B levels. *Elife*  
541 7:e39088.  
542 Lin, D.M., and Goodman, C.S. (1994). Ectopic and increased expression of Fasciclin II alters  
543 motoneuron growth cone guidance. *Neuron* 13, 507–523.

544 Liu, H., Juo, Z.S., Shim, A.H., Focia, P.J., Chen, X., Garcia, K.C., and He, X. (2010). Structural  
545 Basis of Semaphorin-Plexin Recognition and Viral Mimicry from Sema7A and A39R Complexes  
546 with PlexinC1. *Cell*.

547 Nogi, T., Yasui, N., Mihara, E., Matsunaga, Y., Noda, M., Yamashita, N., Toyofuku, T.,  
548 Uchiyama, S., Goshima, Y., Kumanogoh, A., et al. (2010). Structural basis for semaphorin  
549 signalling through the plexin receptor. *Nature*.

550 Pascoe, H.G., Wang, Y., and Zhang, X. (2015). Structural mechanisms of plexin signaling. *Prog.*  
551 *Biophys. Mol. Biol.* *118*, 161–168.

552 Pasterkamp, R.J. (2012). Getting neural circuits into shape with semaphorins. *Nat. Rev.*  
553 *Neurosci.* *13*, 605–618.

554 Potter, C.J., Tasic, B., Russler, E.V., Liang, L., and Luo, L. (2010). The Q system: a repressible  
555 binary system for transgene expression, lineage tracing, and mosaic analysis. *Cell* *141*, 536–  
556 548.

557 Sanes, J.R., and Yamagata, M. (2009). Many paths to synaptic specificity. *Annu. Rev. Cell Dev.*  
558 *Biol.* *25*, 161–195.

559 Shang, G., Brautigam, C.A., Chen, R., Lu, D., Torres-Vazquez, J., and Zhang, X. (2017).  
560 Structure analyses reveal a regulated oligomerization mechanism of the PlexinD1/GIPC/myosin  
561 VI complex. *Elife*.

562 Siebold, C., and Jones, E.Y. (2013). Structural insights into semaphorins and their receptors.  
563 *Semin. Cell Dev. Biol.* *24*, 139–145.

564 Sweeney, L.B., Couto, A., Chou, Y.-H., Berdnik, D., Dickson, B.J., Luo, L., and Komiyama, T.  
565 (2007). Temporal target restriction of olfactory receptor neurons by Semaphorin-1a/PlexinA-  
566 mediated axon-axon interactions. *Neuron* *53*, 185–200.

567 Tong, Y., Chugha, P., Hota, P.K., Alviani, R.S., Li, M., Tempel, W., Shen, L., Park, H.W., and  
568 Buck, M. (2007). Binding of Rac1, Rnd1, and RhoD to a novel Rho GTPase interaction motif  
569 destabilizes dimerization of the plexin-B1 effector domain. *J.Biol.Chem.*

570 Tong, Y., Hota, P.K., Hamaneh, M.B., and Buck, M. (2008). Insights into Oncogenic Mutations  
571 of Plexin-B1 Based on the Solution Structure of the Rho GTPase Binding Domain. *Structure*.

572 Tong, Y., Hota, P.K., Penachioni, J.Y., Hamaneh, M.B., Kim, S., Alviani, R.S., Shen, L., He, H.,  
573 Tempel, W., Tamagnone, L., et al. (2009). Structure and function of the intracellular region of  
574 the plexin-b1 transmembrane receptor. *J.Biol.Chem.*

575 Wang, Y., He, H., Srivastava, N., Vikarunnessa, S., Chen, Y.B., Jiang, J., Cowan, C.W., and  
576 Zhang, X. (2012). Plexins Are GTPase-Activating Proteins for Rap and Are Activated by  
577 Induced Dimerization. *Sci.Signal*.

578 Wang, Y., Pascoe, H.G., Brautigam, C.A., He, H., and Zhang, X. (2013). Structural basis for  
579 activation and non-canonical catalysis of the Rap GTPase activating protein domain of plexin.  
580 *Elife*.

581 Worzfeld, T., and Offermanns, S. (2014). Semaphorins and plexins as therapeutic targets. *Nat.*  
582 *Rev. Drug Discov.* *13*, 603–621.

583 Worzfeld, T., Swiercz, J.M., Sentürk, A., Genz, B., Korostylev, A., Deng, S., Xia, J., Hoshino, M.,  
584 Epstein, J.A., Chan, A.M., et al. (2014). Genetic dissection of plexin signaling in vivo. *Proc. Natl.*  
585 *Acad. Sci. USA* *111*, 2194–2199.

586 Wu, J.S., and Luo, L. (2006). A protocol for dissecting *Drosophila melanogaster* brains for live  
587 imaging or immunostaining. *Nat. Protoc.* *1*, 2110–2115.

588 Wu, B., Li, J., Chou, Y.-H., Luginbuhl, D., and Luo, L. (2017). Fibroblast growth factor signaling  
589 instructs ensheathing glia wrapping of *Drosophila* olfactory glomeruli. *Proc. Natl. Acad. Sci. USA*  
590 *114*, 7505–7512.

591 Yang, D.-S., Roh, S., and Jeong, S. (2016). The axon guidance function of Rap1 small GTPase  
592 is independent of PlexA RasGAP activity in *Drosophila*. *Dev. Biol.* *418*, 258–267.

593 Zipursky, S.L., and Sanes, J.R. (2010). Chemoaffinity revisited: dscams, protocadherins, and  
594 neural circuit assembly. *Cell* *143*, 343–353.

595  
596  
597  
598



## 599 **Figure Legends**

600 **Figure 1.** Systematic mutagenesis of PlexB structural motifs and functional interrogation in the  
601 stepwise assembly of the *Drosophila* olfactory map. **(A)** The PlexB protein consists of several  
602 conserved structural motifs, including an extracellular Sema domain, a juxtamembrane  
603 convertase cleavage site, a cytoplasmic GTPase-binding region for Rac1 and Rho1, and a  
604 cytoplasmic bipartite GAP domain. **(B)** Schematic summary of PlexB variants generated in this  
605 study. Each variant encodes either a mutated form of PlexB with one structural motif disrupted or  
606 a cleaved product of PlexB. **(C)** In the developing antennal lobe, ORN axons first fasciculate into  
607 bundles. Each ORN axon chooses a defined trajectory along the edge of the antennal lobe, in  
608 part responding to the extracellular Sema-2a/2b gradients (orange). Subsequently, ORN axons  
609 innervate the antennal lobe to interact with dendrites of prospective projection neuron partners  
610 and thus establish specific synaptic connections. PlexB participates in all these processes (Li et  
611 al., 2018b), providing an *in vivo* platform for examining the functionality of PlexB variants in  
612 multiple, distinct wiring steps.

613  
614 **Figure 1-figure supplement 1.** Western blot showing that PlexB variants are stably expressed  
615 *in vivo*. Transgenically expressed PlexB variants, driven by pan-neural *C155-GAL4*, were  
616 extracted from brains and ventral nerve cords of third-instar larvae. Full-length PlexB and cleaved  
617 C-terminal fragments were detected by the C-terminal V5 tag. As in our previous observation (Li  
618 et al., 2018b), only a small fraction of PlexB proteins exist in the full-length form. Controls  
619 consisting of N-cadherin and actin were blotted after stripping the membrane.

620  
621 **Figure 2.** Axon fasciculation requires full-length PlexB but not its cytoplasmic motifs individually.  
622 **(A)** In a *wild-type* fly brain at 24hAPF, ORN axons fasciculate into two bundles (left panel; white  
623 arrowheads) surrounding the antennal lobe without innervating it (left panel; empty white  
624 arrowhead). Loss of PlexB (*plexB*<sup>-/-</sup>) causes defasciculation of ORN axons with differing severity  
625 (middle and right panels; red arrowheads). In the severe cases, axon bundles are completely  
626 missing (right panel; empty blue arrowheads). ORN axons were labeled by pan-ORN *Peb-GAL4*  
627 (Sweeney et al., 2007) driven mtdTomato expression. **(B)** Quantification of fasciculation defects  
628 by binning antennal lobes into three categories – no, mild, and severe defasciculation. Expressing  
629 wild-type PlexB in ORNs significantly but not completely restores ORN axon fasciculation in *plexB*  
630 mutant flies. “Rescue” hereafter denotes ORN-specific expression of PlexB variants in *plexB*<sup>-/-</sup>  
631 flies. **(C–K)** Quantification of fasciculation defects in ORN-specific rescue experiments with  
632 respective PlexB variants. Sample sizes are noted in parentheses. Significance of the  
633 contingency tables in Figure 2B–K was determined by Fisher’s exact test. ns, not significant;  
634 \*\*p<0.01; \*\*\*p<0.001; \*\*\*\*p<0.0001. Images are shown as maximum z-projections of confocal  
635 stacks. Scale bars, 10µm. Axes, D (dorsal), L (lateral).

636

637 **Figure 3.** ORN trajectory choice requires both extracellular and cytoplasmic modules of PlexB.  
638 Both full-length and reconstituted fragments of PlexB transduce signal in trajectory choice. **(A)** In  
639 *wild-type* pupal brains at 24hAPF, ORN axons form the dorsolateral (DL) and ventromedial (VM)  
640 trajectories circumnavigating the antennal lobe (left panels). Overexpression of PlexB in ORNs  
641 shifts ORN axons to the DL trajectory (right panels). ORN axons were labeled by pan-ORN *Peb-*  
642 *GAL4* (Sweeney et al., 2007) driven mtdTomato expression. Antennal lobes were co-stained with  
643 a neuropil marker N-cadherin (NCad). **(B)** Fluorescence intensity ratios of ORN axon trajectories  
644 (DL/VM) in *wild-type* and PlexB overexpression brains at 24hAPF. Geometric means: control,  
645 0.68; WT OE, 0.94. “OE” hereafter denotes ORN-specific overexpression of PlexB variants. **(C–**  
646 **K)** Fluorescence intensity ratios of ORN axon trajectories (DL/VM) for respective PlexB variants.  
647 Geometric means:  $\Delta$ Sema, 0.68; GAP<sup>mut</sup>, 1.01;  $\Delta$ Rac1, 0.73; Rac1<sup>mut</sup>, 0.84;  $\Delta$ Rho1, 0.81; Uncleav,  
648 1.04; Cleav<sup>Sec</sup>, 0.69; Cleav<sup>TM<sub>Cyto</sub></sup>, 0.65; Cleav<sup>Sec</sup> + Cleav<sup>TM<sub>Cyto</sub></sup>, 0.82. Sample sizes are noted in  
649 parentheses. Significance among multiple groups in Figures 3B–K was determined by one-way  
650 ANOVA with Tukey’s test for multiple comparisons. ns, not significant; \*p<0.05; \*\*p<0.01;  
651 \*\*\*p<0.001; \*\*\*\*p<0.0001. Images are shown as maximum z-projections of confocal stacks. Scale  
652 bars, 10 $\mu$ m. Axes, D (dorsal), L (lateral).

653  
654 **Figure 4.** Synaptic partner selection engages both extracellular and cytoplasmic motifs of PlexB.  
655 **(A)** In *wild-type* fly brains, Or92a+ ORN axons exclusively innervate the VA2 glomerulus at the  
656 ventromedial corner of an antennal lobe (left panels; white arrowhead). Overexpression of PlexB  
657 in ORNs causes stereotypical mistargeting to the medial DM5 glomerulus (right panels; red  
658 arrowhead). Or92a+ ORN axons were labeled by membrane-localized rCD2 driven by an Or92a  
659 promoter. Antennal lobes were co-stained with a neuropil marker N-cadherin (NCad). **(B)**  
660 Penetrance of glomerular mistargeting in *wild-type* and PlexB overexpression brains. “OE”  
661 hereafter denotes ORN-specific overexpression of PlexB variants. **(C–K)** Penetrance of  
662 glomerular mistargeting for respective PlexB variants. Sample sizes are noted in parentheses.  
663 Significance of the contingency tables in Figure 4B–K was determined by Fisher’s exact test. ns,  
664 not significant; \*\*p<0.01; \*\*\*p<0.001; \*\*\*\*p<0.0001. Images are shown as maximum z-projections  
665 of confocal stacks. Scale bars, 10 $\mu$ m. Axes, D (dorsal), L (lateral).

666  
667 **Figure 5.** Differential engagement of PlexB structural motifs in distinct neurodevelopmental tasks.  
668 As illustrated in columns, each distinct wiring step in the development of the fly olfactory map  
669 employs a unique combination of signaling motifs. From the perspective of individual structural  
670 motifs shown in rows, each one exhibits differing importance at different developmental stages,  
671 except the universally required Sema domain and the generally expendable GAP catalytic unit.

672  
673

**Figure 1**

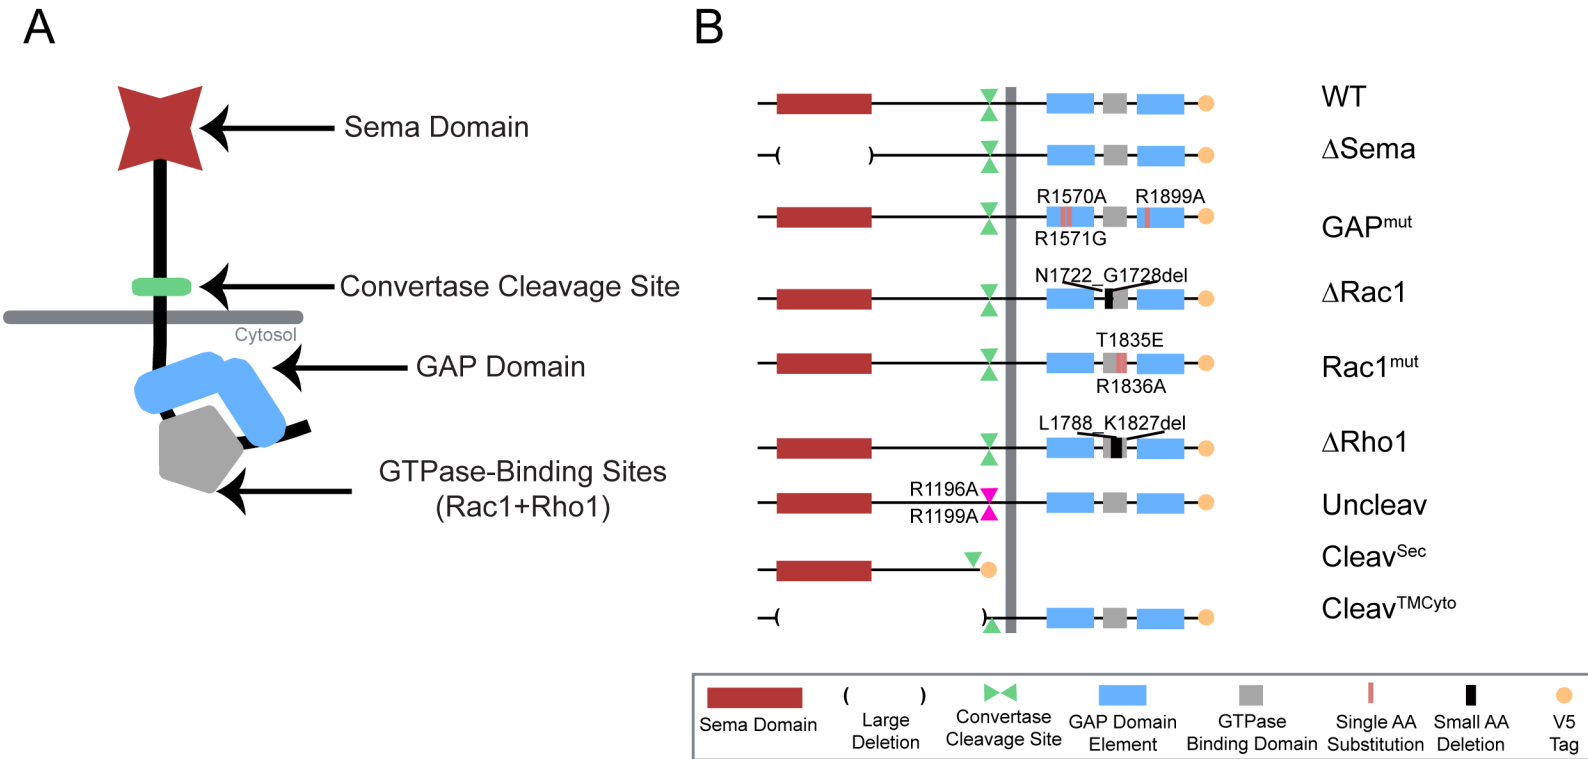

**C**

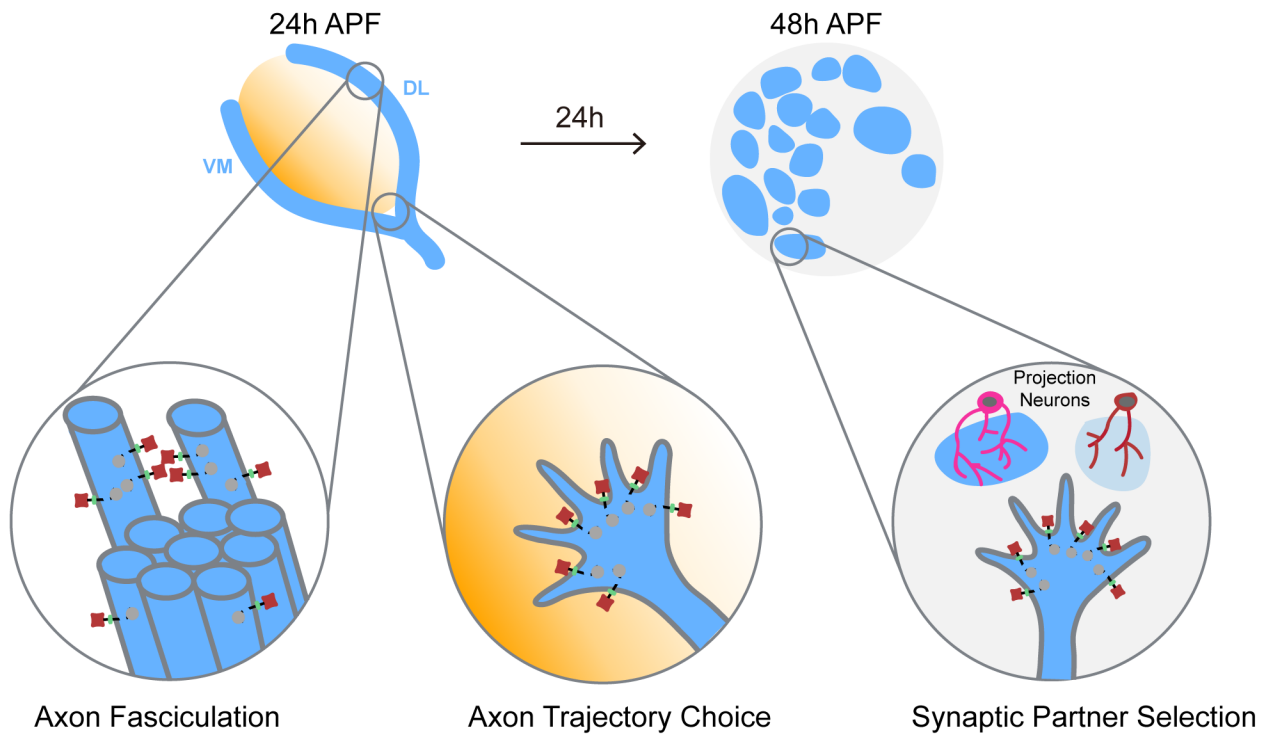



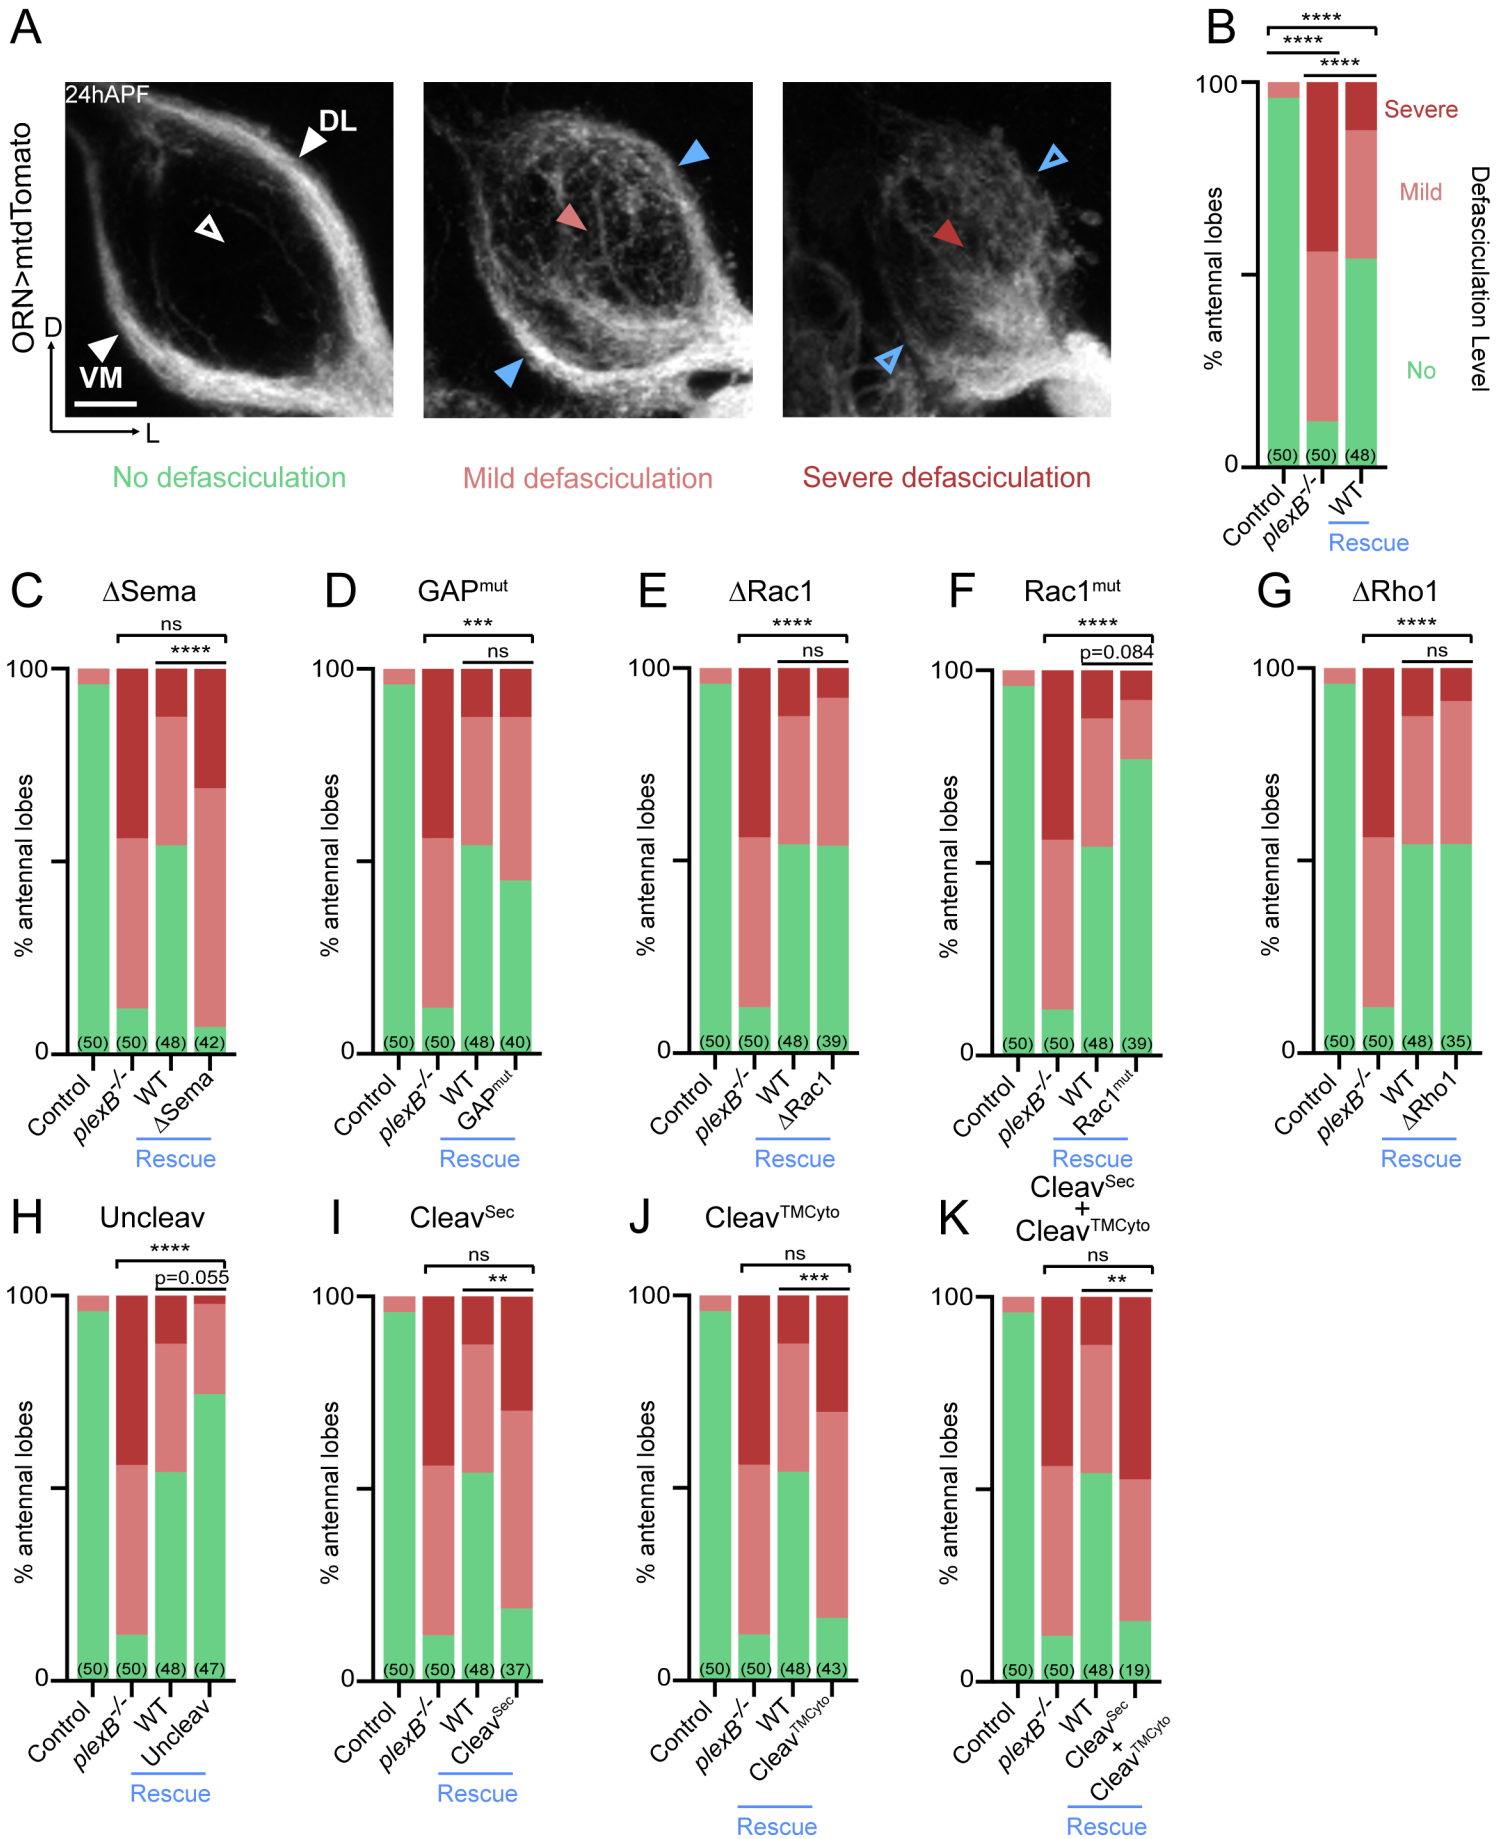

# Figure 3

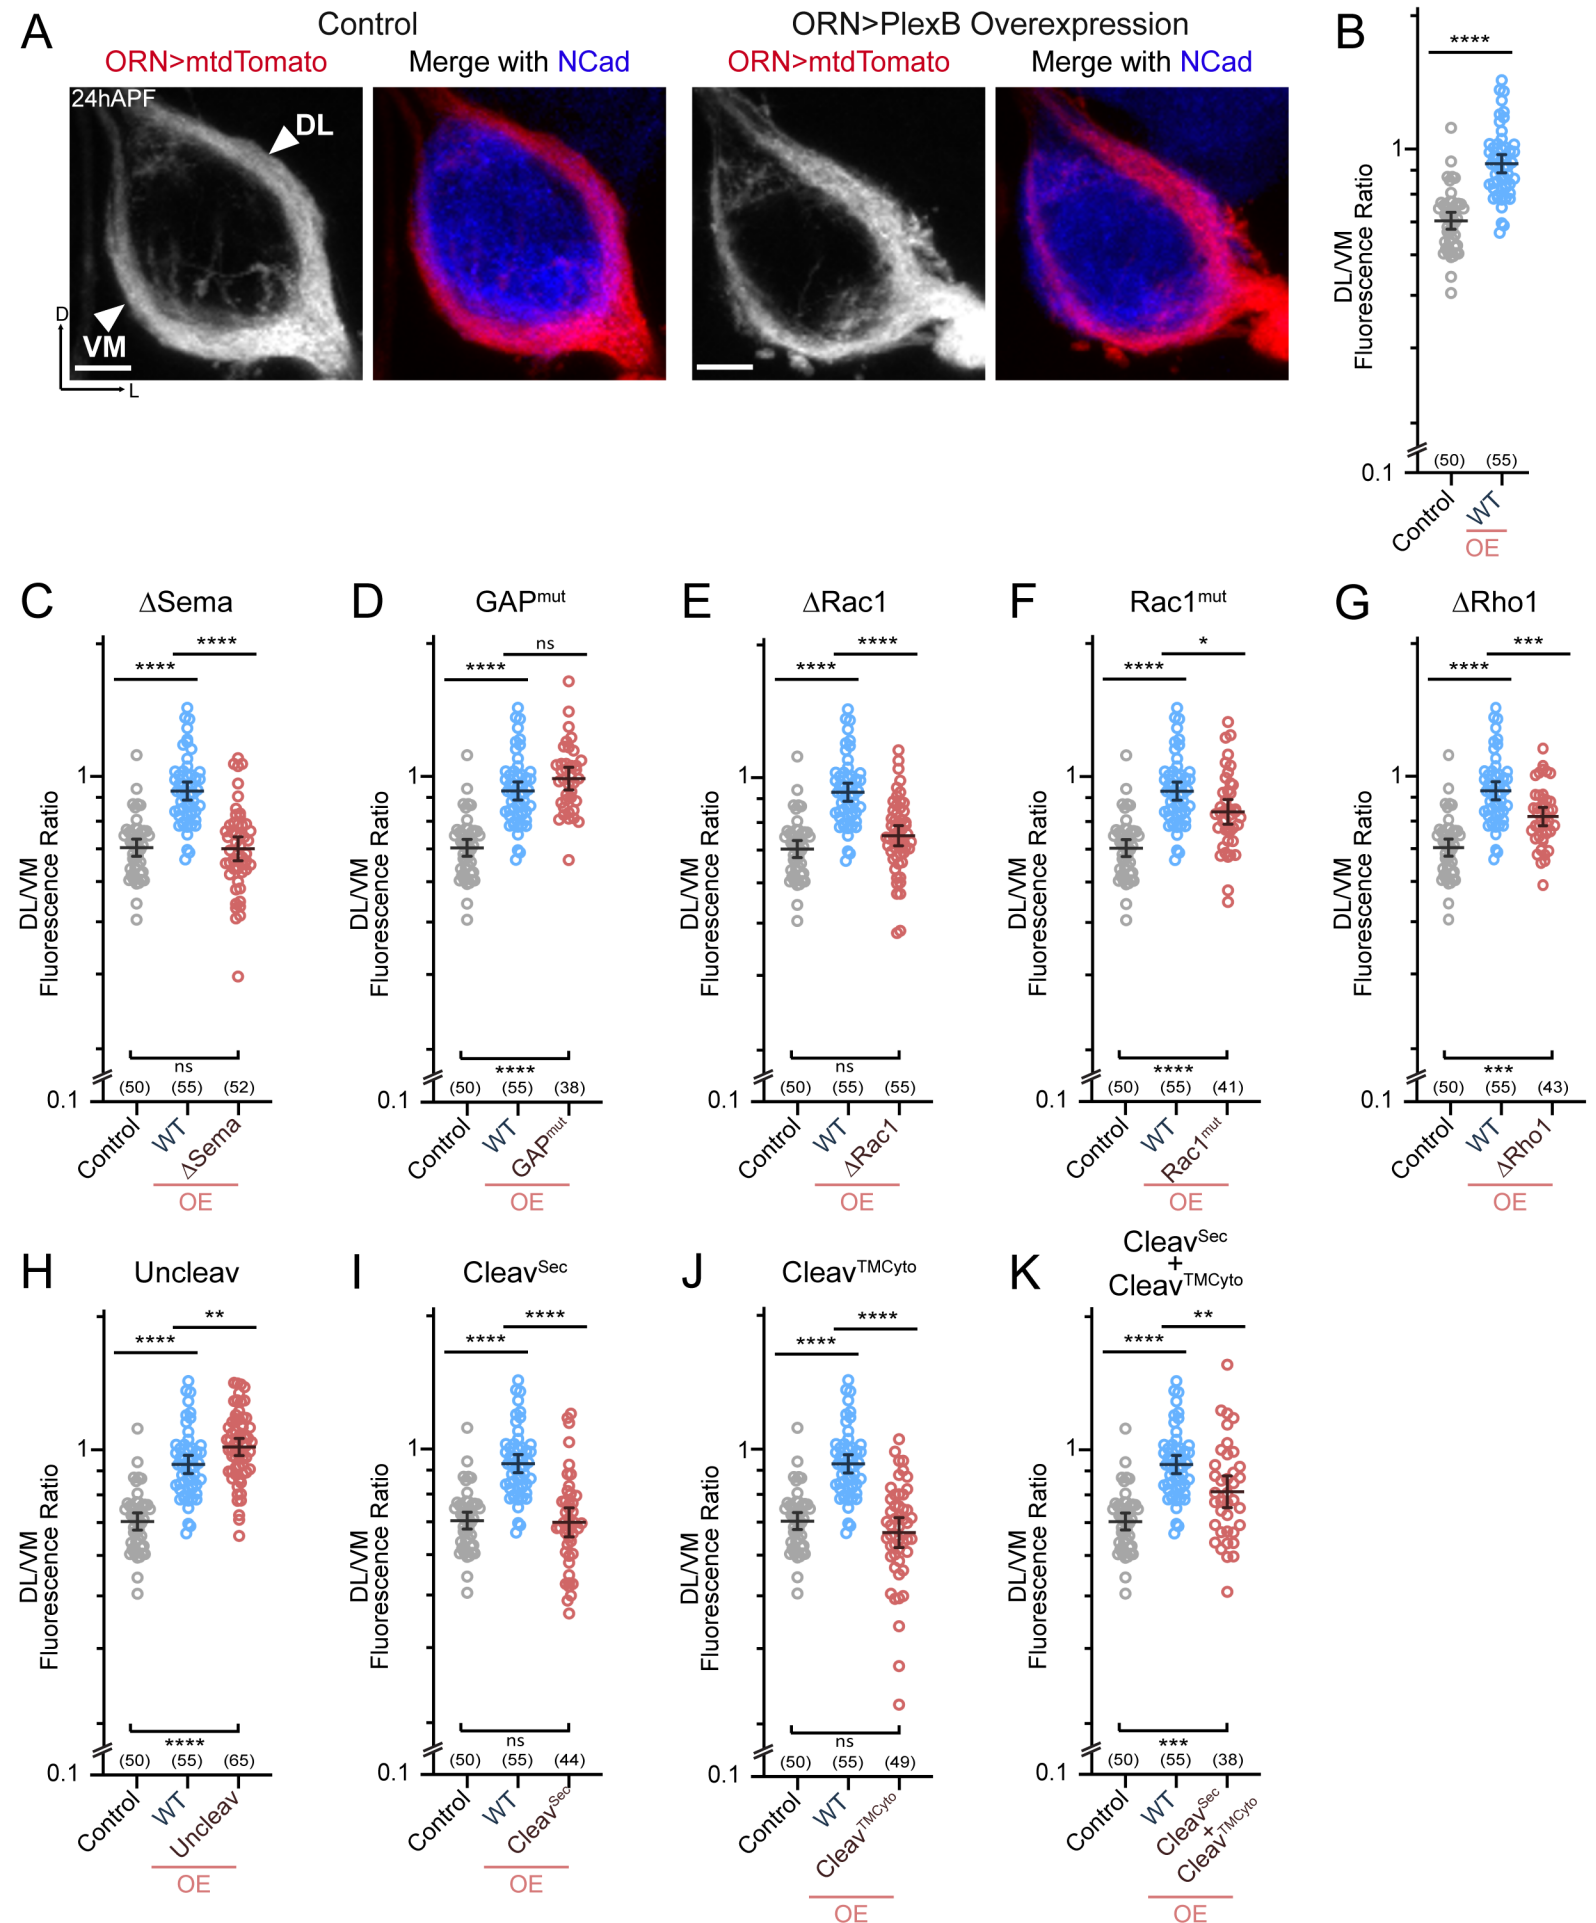

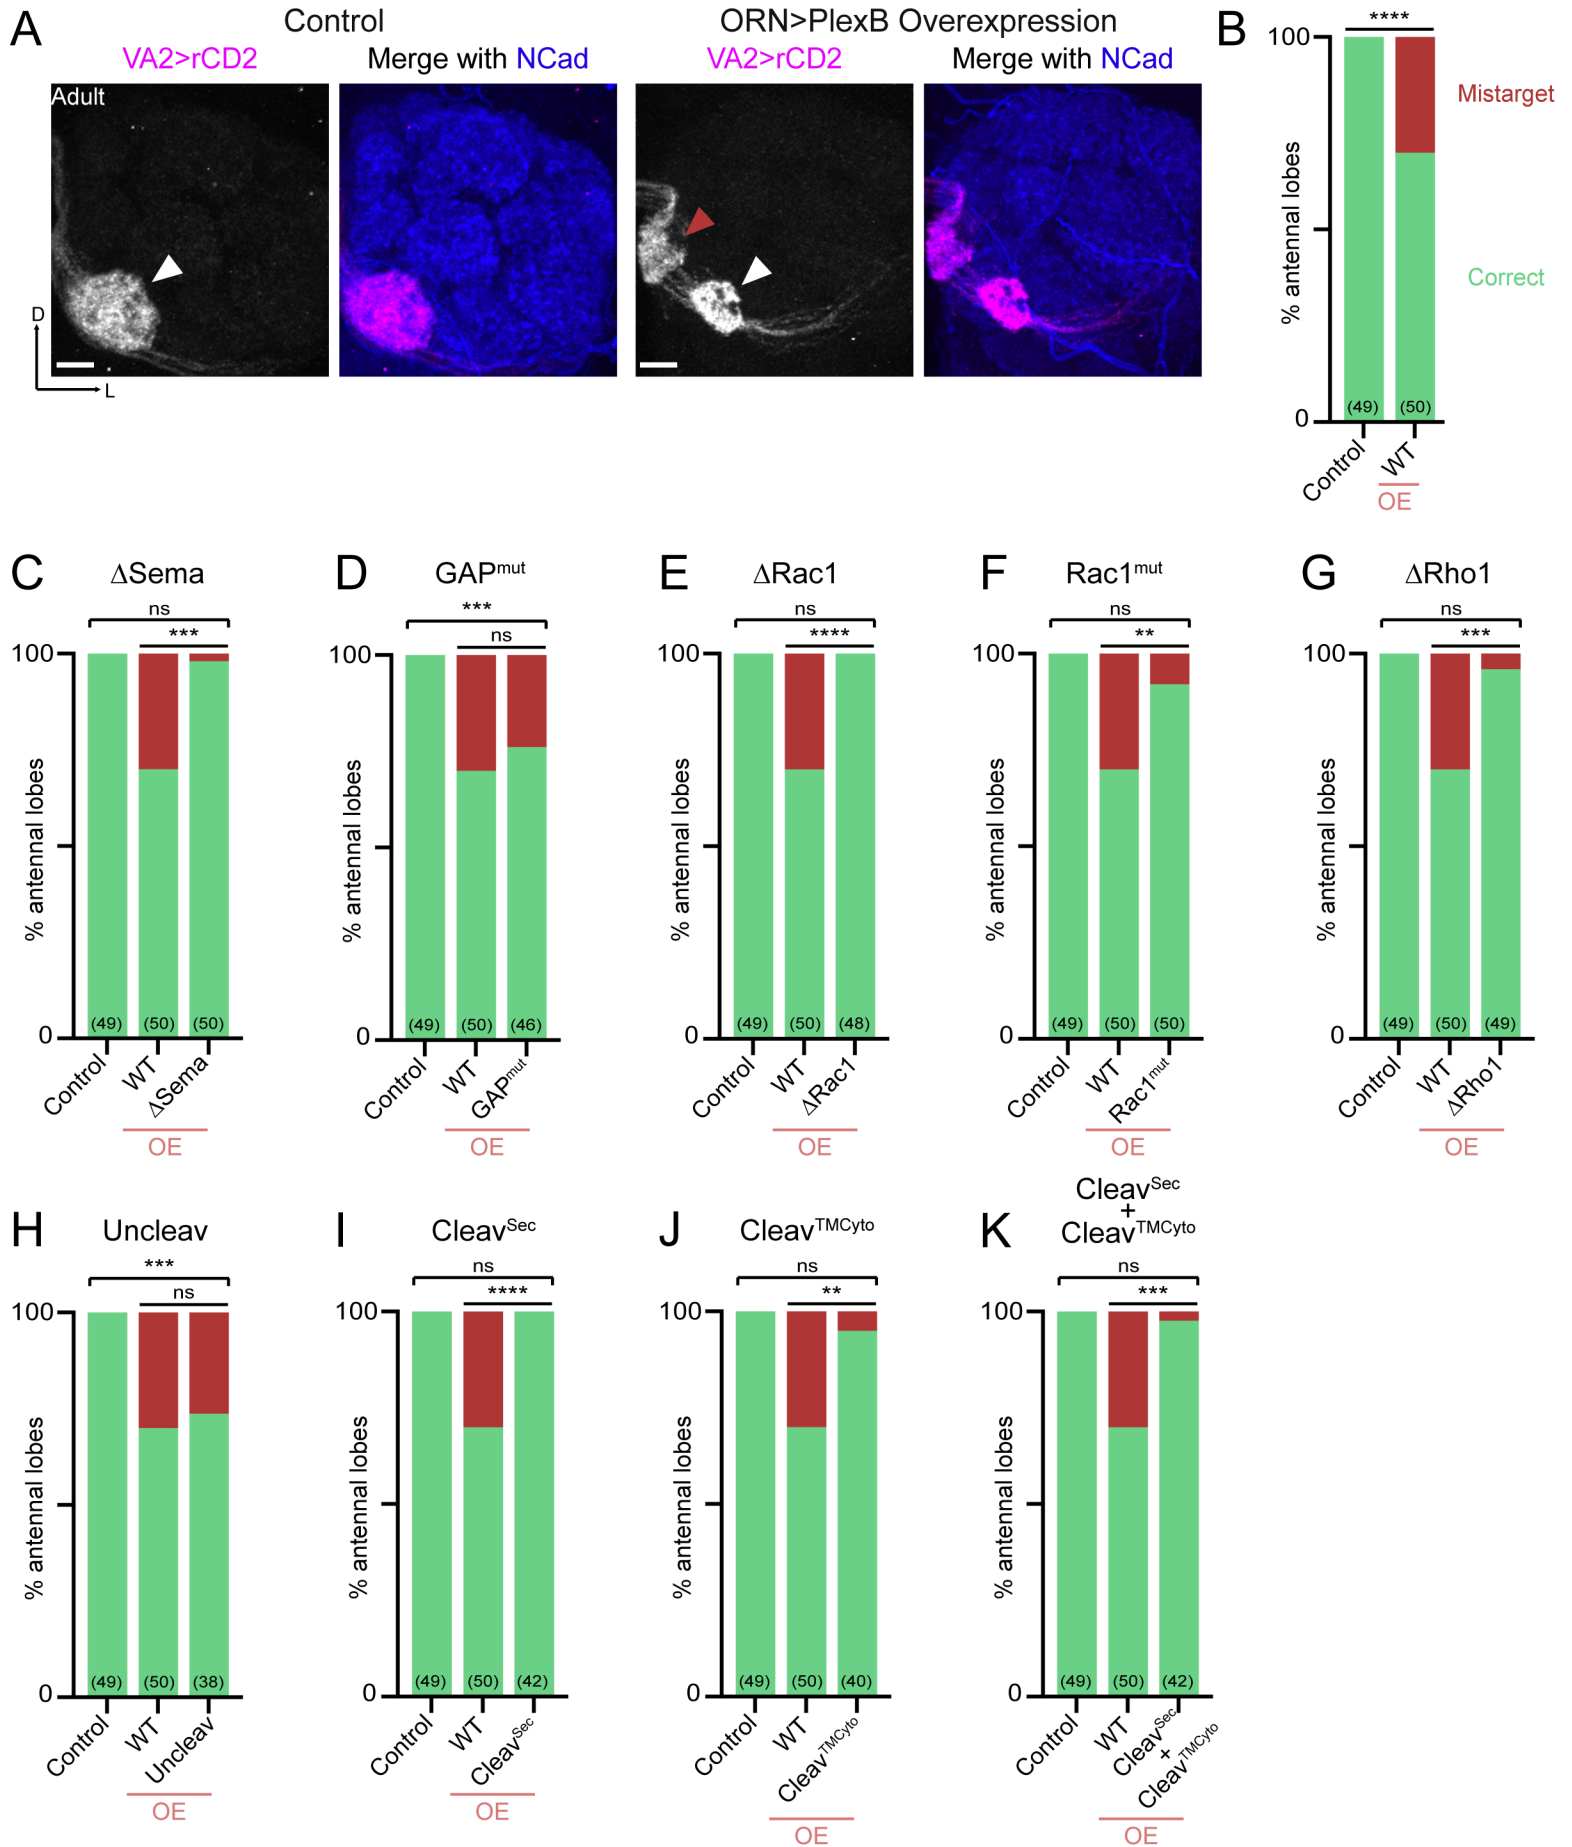

**Figure 5**

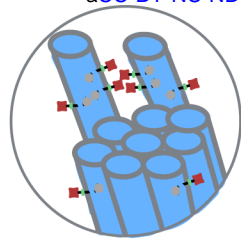

Axon Fasciculation

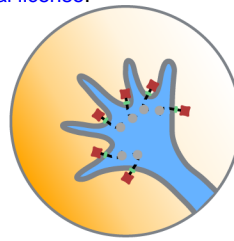

Axon Trajectory Choice

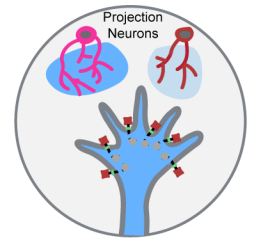

Synaptic Partner Selection

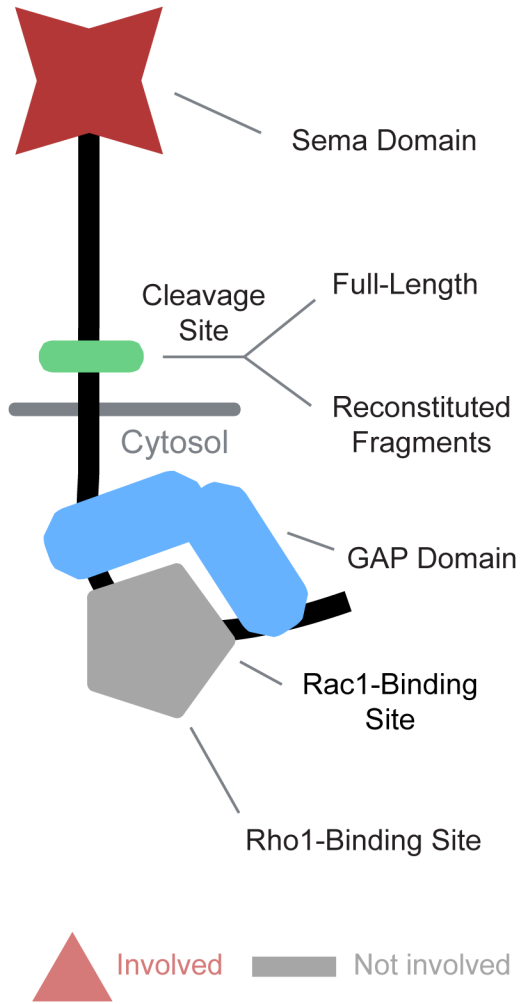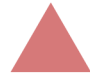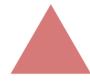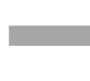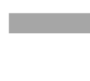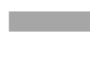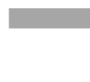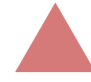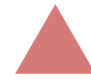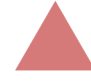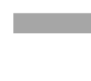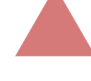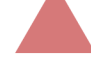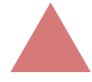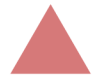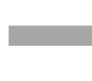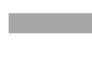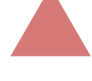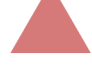



**Supplementary File 1.** Genotypes of flies in each experiment.

**Figure Genotype**

**Figure 1-figure supplement 1**

|                                                                                                                  |
|------------------------------------------------------------------------------------------------------------------|
| WT: <i>C155-GAL4/+ (or Y);; UAS-PlexB (WT)/+</i>                                                                 |
| $\Delta$ Sema: <i>C155-GAL4/+ (or Y);; UAS-PlexB (<math>\Delta</math>Sema)/+</i>                                 |
| GAP <sup>mut</sup> : <i>C155-GAL4/+ (or Y);; UAS-PlexB (GAP<sup>mut</sup>)/+</i>                                 |
| $\Delta$ Rac1: <i>C155-GAL4/+ (or Y);; UAS-PlexB (<math>\Delta</math>Rac1)/+</i>                                 |
| Rac1 <sup>mut</sup> : <i>C155-GAL4/+ (or Y);; UAS-PlexB (Rac1<sup>mut</sup>)/+</i>                               |
| $\Delta$ Rho1: <i>C155-GAL4/+ (or Y);; UAS-PlexB (<math>\Delta</math>Rho1)/+</i>                                 |
| Uncleav: <i>C155-GAL4/+ (or Y);; UAS-PlexB (Uncleav)/+</i>                                                       |
| Cleav <sup>Sec</sup> : <i>C155-GAL4/+ (or Y);; UAS-PlexB (Cleav<sup>Sec</sup>)/+</i>                             |
| Cleav <sup>TM<sub>Cyto</sub></sup> : <i>C155-GAL4/+ (or Y);; UAS-PlexB (Cleav<sup>TM<sub>Cyto</sub></sup>)/+</i> |

**Figure 2**

|   |                                                                                                                                                                                                                                                                                                                                                                                                                   |
|---|-------------------------------------------------------------------------------------------------------------------------------------------------------------------------------------------------------------------------------------------------------------------------------------------------------------------------------------------------------------------------------------------------------------------|
| B | Control: <i>Pebbled-GAL4, UAS-mtdTomato/+ (or Y)</i><br>$plexB^{-/-}$ : <i>Pebbled-GAL4, UAS-mtdTomato/+ (or Y);; plexB<sup>-</sup>/plexB<sup>-</sup></i><br>WT: <i>Pebbled-GAL4, UAS-mtdTomato/+ (or Y);; UAS-PlexB (WT)/+; plexB<sup>-</sup>/plexB<sup>-</sup></i>                                                                                                                                              |
| C | Control: <i>Pebbled-GAL4, UAS-mtdTomato/+ (or Y)</i><br>$plexB^{-/-}$ : <i>Pebbled-GAL4, UAS-mtdTomato/+ (or Y);; plexB<sup>-</sup>/plexB<sup>-</sup></i><br>WT: <i>Pebbled-GAL4, UAS-mtdTomato/+ (or Y);; UAS-PlexB (WT)/+; plexB<sup>-</sup>/plexB<sup>-</sup></i><br>$\Delta$ Sema: <i>Pebbled-GAL4, UAS-mtdTomato/+ (or Y);; UAS-PlexB (<math>\Delta</math>Sema)/+; plexB<sup>-</sup>/plexB<sup>-</sup></i>   |
| D | Control: <i>Pebbled-GAL4, UAS-mtdTomato/+ (or Y)</i><br>$plexB^{-/-}$ : <i>Pebbled-GAL4, UAS-mtdTomato/+ (or Y);; plexB<sup>-</sup>/plexB<sup>-</sup></i><br>WT: <i>Pebbled-GAL4, UAS-mtdTomato/+ (or Y);; UAS-PlexB (WT)/+; plexB<sup>-</sup>/plexB<sup>-</sup></i><br>GAP <sup>mut</sup> : <i>Pebbled-GAL4, UAS-mtdTomato/+ (or Y);; UAS-PlexB (GAP<sup>mut</sup>)/+; plexB<sup>-</sup>/plexB<sup>-</sup></i>   |
| E | Control: <i>Pebbled-GAL4, UAS-mtdTomato/+ (or Y)</i><br>$plexB^{-/-}$ : <i>Pebbled-GAL4, UAS-mtdTomato/+ (or Y);; plexB<sup>-</sup>/plexB<sup>-</sup></i><br>WT: <i>Pebbled-GAL4, UAS-mtdTomato/+ (or Y);; UAS-PlexB (WT)/+; plexB<sup>-</sup>/plexB<sup>-</sup></i><br>$\Delta$ Rac1: <i>Pebbled-GAL4, UAS-mtdTomato/+ (or Y);; UAS-PlexB (<math>\Delta</math>Rac1)/+; plexB<sup>-</sup>/plexB<sup>-</sup></i>   |
| F | Control: <i>Pebbled-GAL4, UAS-mtdTomato/+ (or Y)</i><br>$plexB^{-/-}$ : <i>Pebbled-GAL4, UAS-mtdTomato/+ (or Y);; plexB<sup>-</sup>/plexB<sup>-</sup></i><br>WT: <i>Pebbled-GAL4, UAS-mtdTomato/+ (or Y);; UAS-PlexB (WT)/+; plexB<sup>-</sup>/plexB<sup>-</sup></i><br>Rac1 <sup>mut</sup> : <i>Pebbled-GAL4, UAS-mtdTomato/+ (or Y);; UAS-PlexB (Rac1<sup>mut</sup>)/+; plexB<sup>-</sup>/plexB<sup>-</sup></i> |
| G | Control: <i>Pebbled-GAL4, UAS-mtdTomato/+ (or Y)</i><br>$plexB^{-/-}$ : <i>Pebbled-GAL4, UAS-mtdTomato/+ (or Y);; plexB<sup>-</sup>/plexB<sup>-</sup></i><br>WT: <i>Pebbled-GAL4, UAS-mtdTomato/+ (or Y);; UAS-PlexB (WT)/+; plexB<sup>-</sup>/plexB<sup>-</sup></i><br>$\Delta$ Rho1: <i>Pebbled-GAL4, UAS-mtdTomato/+ (or Y);; UAS-PlexB (<math>\Delta</math>Rho1)/+; plexB<sup>-</sup>/plexB<sup>-</sup></i>   |
| H | Control: <i>Pebbled-GAL4, UAS-mtdTomato/+ (or Y)</i><br>$plexB^{-/-}$ : <i>Pebbled-GAL4, UAS-mtdTomato/+ (or Y);; plexB<sup>-</sup>/plexB<sup>-</sup></i><br>WT: <i>Pebbled-GAL4, UAS-mtdTomato/+ (or Y);; UAS-PlexB (WT)/+; plexB<sup>-</sup>/plexB<sup>-</sup></i><br>Uncleav: <i>Pebbled-GAL4, UAS-mtdTomato/+ (or Y);; UAS-PlexB (Uncleav)/+; plexB<sup>-</sup>/plexB<sup>-</sup></i>                         |
| I | Control: <i>Pebbled-GAL4, UAS-mtdTomato/+ (or Y)</i><br>$plexB^{-/-}$ : <i>Pebbled-GAL4, UAS-mtdTomato/+ (or Y);; plexB<sup>-</sup>/plexB<sup>-</sup></i><br>WT: <i>Pebbled-GAL4, UAS-mtdTomato/+ (or Y);; UAS-PlexB (WT)/+; plexB<sup>-</sup>/plexB<sup>-</sup></i>                                                                                                                                              |

|   |                                                                                                                                                                                                                                                                                                                                                                                                                                                                                                            |
|---|------------------------------------------------------------------------------------------------------------------------------------------------------------------------------------------------------------------------------------------------------------------------------------------------------------------------------------------------------------------------------------------------------------------------------------------------------------------------------------------------------------|
|   | Cleav <sup>Sec</sup> : <i>Pebbled-GAL4, UAS-mtdTomato/+ (or Y);; UAS-PlexB (Cleav<sup>Sec</sup>)/+; plexB<sup>-</sup>/plexB<sup>-</sup></i>                                                                                                                                                                                                                                                                                                                                                                |
| J | Control: <i>Pebbled-GAL4, UAS-mtdTomato/+ (or Y)</i><br><i>plexB<sup>-/-</sup>: Pebbled-GAL4, UAS-mtdTomato/+ (or Y);; plexB<sup>-</sup>/plexB<sup>-</sup></i><br>WT: <i>Pebbled-GAL4, UAS-mtdTomato/+ (or Y);; UAS-PlexB (WT)/+; plexB<sup>-</sup>/plexB<sup>-</sup></i><br>Cleav <sup>TM<sub>Cyto</sub></sup> : <i>Pebbled-GAL4, UAS-mtdTomato/+ (or Y);; UAS-PlexB (Cleav<sup>TM<sub>Cyto</sub></sup>)/+; plexB<sup>-</sup>/plexB<sup>-</sup></i>                                                       |
| K | Control: <i>Pebbled-GAL4, UAS-mtdTomato/+ (or Y)</i><br><i>plexB<sup>-/-</sup>: Pebbled-GAL4, UAS-mtdTomato/+ (or Y);; plexB<sup>-</sup>/plexB<sup>-</sup></i><br>WT: <i>Pebbled-GAL4, UAS-mtdTomato/+ (or Y);; UAS-PlexB (WT)/+; plexB<sup>-</sup>/plexB<sup>-</sup></i><br>Cleav <sup>Sec</sup> + Cleav <sup>TM<sub>Cyto</sub></sup> : <i>Pebbled-GAL4, UAS-mtdTomato/+ (or Y);; UAS-PlexB (Cleav<sup>Sec</sup>)/ UAS-PlexB (Cleav<sup>TM<sub>Cyto</sub></sup>); plexB<sup>-</sup>/plexB<sup>-</sup></i> |

**Figure 3**

|   |                                                                                                                                                                                                                                                                                                                        |
|---|------------------------------------------------------------------------------------------------------------------------------------------------------------------------------------------------------------------------------------------------------------------------------------------------------------------------|
| A | Control: <i>Pebbled-GAL4, UAS-mtdTomato/+ (or Y)</i><br>ORN>PlexB Overexpression: <i>Pebbled-GAL4, UAS-mtdTomato/+ (or Y);; UAS-PlexB (WT)/+</i>                                                                                                                                                                       |
| B | Control: <i>Pebbled-GAL4, UAS-mtdTomato/+ (or Y)</i><br>WT: <i>Pebbled-GAL4, UAS-mtdTomato/+ (or Y);; UAS-PlexB (WT)/+</i>                                                                                                                                                                                             |
| C | Control: <i>Pebbled-GAL4, UAS-mtdTomato/+ (or Y)</i><br>WT: <i>Pebbled-GAL4, UAS-mtdTomato/+ (or Y);; UAS-PlexB (WT)/+</i><br>ΔSema: <i>Pebbled-GAL4, UAS-mtdTomato/+ (or Y);; UAS-PlexB (ΔSema)/+</i>                                                                                                                 |
| D | Control: <i>Pebbled-GAL4, UAS-mtdTomato/+ (or Y)</i><br>WT: <i>Pebbled-GAL4, UAS-mtdTomato/+ (or Y);; UAS-PlexB (WT)/+</i><br>GAP <sup>mut</sup> : <i>Pebbled-GAL4, UAS-mtdTomato/+ (or Y);; UAS-PlexB (GAP<sup>mut</sup>)/+</i>                                                                                       |
| E | Control: <i>Pebbled-GAL4, UAS-mtdTomato/+ (or Y)</i><br>WT: <i>Pebbled-GAL4, UAS-mtdTomato/+ (or Y);; UAS-PlexB (WT)/+</i><br>ΔRac1: <i>Pebbled-GAL4, UAS-mtdTomato/+ (or Y);; UAS-PlexB (ΔRac1)/+</i>                                                                                                                 |
| F | Control: <i>Pebbled-GAL4, UAS-mtdTomato/+ (or Y)</i><br>WT: <i>Pebbled-GAL4, UAS-mtdTomato/+ (or Y);; UAS-PlexB (WT)/+</i><br>Rac1 <sup>mut</sup> : <i>Pebbled-GAL4, UAS-mtdTomato/+ (or Y);; UAS-PlexB (Rac1<sup>mut</sup>)/+</i>                                                                                     |
| G | Control: <i>Pebbled-GAL4, UAS-mtdTomato/+ (or Y)</i><br>WT: <i>Pebbled-GAL4, UAS-mtdTomato/+ (or Y);; UAS-PlexB (WT)/+</i><br>ΔRho1: <i>Pebbled-GAL4, UAS-mtdTomato/+ (or Y);; UAS-PlexB (ΔRho1)/+</i>                                                                                                                 |
| H | Control: <i>Pebbled-GAL4, UAS-mtdTomato/+ (or Y)</i><br>WT: <i>Pebbled-GAL4, UAS-mtdTomato/+ (or Y);; UAS-PlexB (WT)/+</i><br>Uncleav: <i>Pebbled-GAL4, UAS-mtdTomato/+ (or Y);; UAS-PlexB (Uncleav)/+</i>                                                                                                             |
| I | Control: <i>Pebbled-GAL4, UAS-mtdTomato/+ (or Y)</i><br>WT: <i>Pebbled-GAL4, UAS-mtdTomato/+ (or Y);; UAS-PlexB (WT)/+</i><br>Cleav <sup>Sec</sup> : <i>Pebbled-GAL4, UAS-mtdTomato/+ (or Y);; UAS-PlexB (Cleav<sup>Sec</sup>)/+</i>                                                                                   |
| J | Control: <i>Pebbled-GAL4, UAS-mtdTomato/+ (or Y)</i><br>WT: <i>Pebbled-GAL4, UAS-mtdTomato/+ (or Y);; UAS-PlexB (WT)/+</i><br>Cleav <sup>TM<sub>Cyto</sub></sup> : <i>Pebbled-GAL4, UAS-mtdTomato/+ (or Y);; UAS-PlexB (Cleav<sup>TM<sub>Cyto</sub></sup>)/+</i>                                                       |
| K | Control: <i>Pebbled-GAL4, UAS-mtdTomato/+ (or Y)</i><br>WT: <i>Pebbled-GAL4, UAS-mtdTomato/+ (or Y);; UAS-PlexB (WT)/+</i><br>Cleav <sup>Sec</sup> + Cleav <sup>TM<sub>Cyto</sub></sup> : <i>Pebbled-GAL4, UAS-mtdTomato/+ (or Y);; UAS-PlexB (Cleav<sup>Sec</sup>)/ UAS-PlexB (Cleav<sup>TM<sub>Cyto</sub></sup>)</i> |

**Figure 4**

|   |                                                                                                                                                                                                                                                                                                                   |
|---|-------------------------------------------------------------------------------------------------------------------------------------------------------------------------------------------------------------------------------------------------------------------------------------------------------------------|
| A | Control: <i>Pebbled-GAL4/+ (or Y); Or92a-rCD2/+</i><br>ORN>PlexB Overexpression: <i>Pebbled-GAL4/+ (or Y); Or92a-rCD2/+; UAS-PlexB (WT)/+</i>                                                                                                                                                                     |
| B | Control: <i>Pebbled-GAL4/+ (or Y); Or92a-rCD2/+</i><br>WT: <i>Pebbled-GAL4/+ (or Y); Or92a-rCD2/+; UAS-PlexB (WT)/+</i>                                                                                                                                                                                           |
| C | Control: <i>Pebbled-GAL4/+ (or Y); Or92a-rCD2/+</i><br>WT: <i>Pebbled-GAL4/+ (or Y); Or92a-rCD2/+; UAS-PlexB (WT)/+</i><br>$\Delta$ Sema: <i>Pebbled-GAL4/+ (or Y); Or92a-rCD2/+; UAS-PlexB (<math>\Delta</math>Sema)/+</i>                                                                                       |
| D | Control: <i>Pebbled-GAL4/+ (or Y); Or92a-rCD2/+</i><br>WT: <i>Pebbled-GAL4/+ (or Y); Or92a-rCD2/+; UAS-PlexB (WT)/+</i><br>GAP <sup>mut</sup> : <i>Pebbled-GAL4/+ (or Y); Or92a-rCD2/+; UAS-PlexB (GAP<sup>mut</sup>)/+</i>                                                                                       |
| E | Control: <i>Pebbled-GAL4/+ (or Y); Or92a-rCD2/+</i><br>WT: <i>Pebbled-GAL4/+ (or Y); Or92a-rCD2/+; UAS-PlexB (WT)/+</i><br>$\Delta$ Rac1: <i>Pebbled-GAL4/+ (or Y); Or92a-rCD2/+; UAS-PlexB (<math>\Delta</math>Rac1)/+</i>                                                                                       |
| F | Control: <i>Pebbled-GAL4/+ (or Y); Or92a-rCD2/+</i><br>WT: <i>Pebbled-GAL4/+ (or Y); Or92a-rCD2/+; UAS-PlexB (WT)/+</i><br>Rac1 <sup>mut</sup> : <i>Pebbled-GAL4/+ (or Y); Or92a-rCD2/+; UAS-PlexB (Rac1<sup>mut</sup>)/+</i>                                                                                     |
| G | Control: <i>Pebbled-GAL4/+ (or Y); Or92a-rCD2/+</i><br>WT: <i>Pebbled-GAL4/+ (or Y); Or92a-rCD2/+; UAS-PlexB (WT)/+</i><br>$\Delta$ Rho1: <i>Pebbled-GAL4/+ (or Y); Or92a-rCD2/+; UAS-PlexB (<math>\Delta</math>Rho1)/+</i>                                                                                       |
| H | Control: <i>Pebbled-GAL4/+ (or Y); Or92a-rCD2/+</i><br>WT: <i>Pebbled-GAL4/+ (or Y); Or92a-rCD2/+; UAS-PlexB (WT)/+</i><br>Uncleav: <i>Pebbled-GAL4/+ (or Y); Or92a-rCD2/+; UAS-PlexB (Uncleav)/+</i>                                                                                                             |
| I | Control: <i>Pebbled-GAL4/+ (or Y); Or92a-rCD2/+</i><br>WT: <i>Pebbled-GAL4/+ (or Y); Or92a-rCD2/+; UAS-PlexB (WT)/+</i><br>Cleav <sup>Sec</sup> : <i>Pebbled-GAL4/+ (or Y); Or92a-rCD2/+; UAS-PlexB (Cleav<sup>Sec</sup>)/+</i>                                                                                   |
| J | Control: <i>Pebbled-GAL4/+ (or Y); Or92a-rCD2/+</i><br>WT: <i>Pebbled-GAL4/+ (or Y); Or92a-rCD2/+; UAS-PlexB (WT)/+</i><br>Cleav <sup>TM<sub>Cyto</sub></sup> : <i>Pebbled-GAL4/+ (or Y); Or92a-rCD2/+; UAS-PlexB (Cleav<sup>TM<sub>Cyto</sub></sup>)/+</i>                                                       |
| K | Control: <i>Pebbled-GAL4/+ (or Y); Or92a-rCD2/+</i><br>WT: <i>Pebbled-GAL4/+ (or Y); Or92a-rCD2/+; UAS-PlexB (WT)/+</i><br>Cleav <sup>Sec</sup> + Cleav <sup>TM<sub>Cyto</sub></sup> : <i>Pebbled-GAL4/+ (or Y); Or92a-rCD2/+; UAS-PlexB (Cleav<sup>Sec</sup>)/ UAS-PlexB (Cleav<sup>TM<sub>Cyto</sub></sup>)</i> |
